# Supplementary material for: Novel indolyl 1,2,4-triazole derivatives as potential anti-proliferative agents: in silico studies, synthesis, and biological evaluation
Source: Royal Society of Chemistry journal article supplement (doi:10.1039/d3md00524k), 2023-11-24

Spectrum RT 0.25 - 0.26 (2 scans)  
Va\_Scan1\_is1 2022.07.07 10:00:59 ;  
APCI + Max: 2.1E8

Intensity

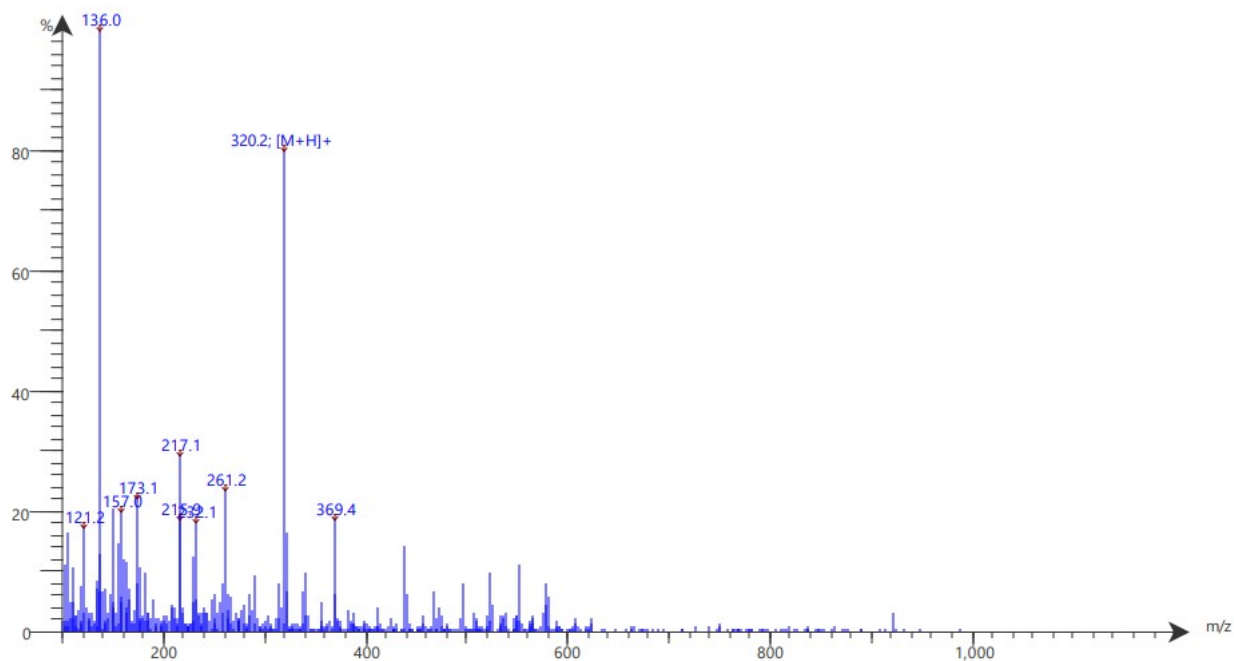

Spectrum RT 0.56 - 0.68 (8 scans)  
Vb\_Scan2\_is2 2022.07.07 10:04:14 ;  
APCI - Max: 6.4E6

Intensity

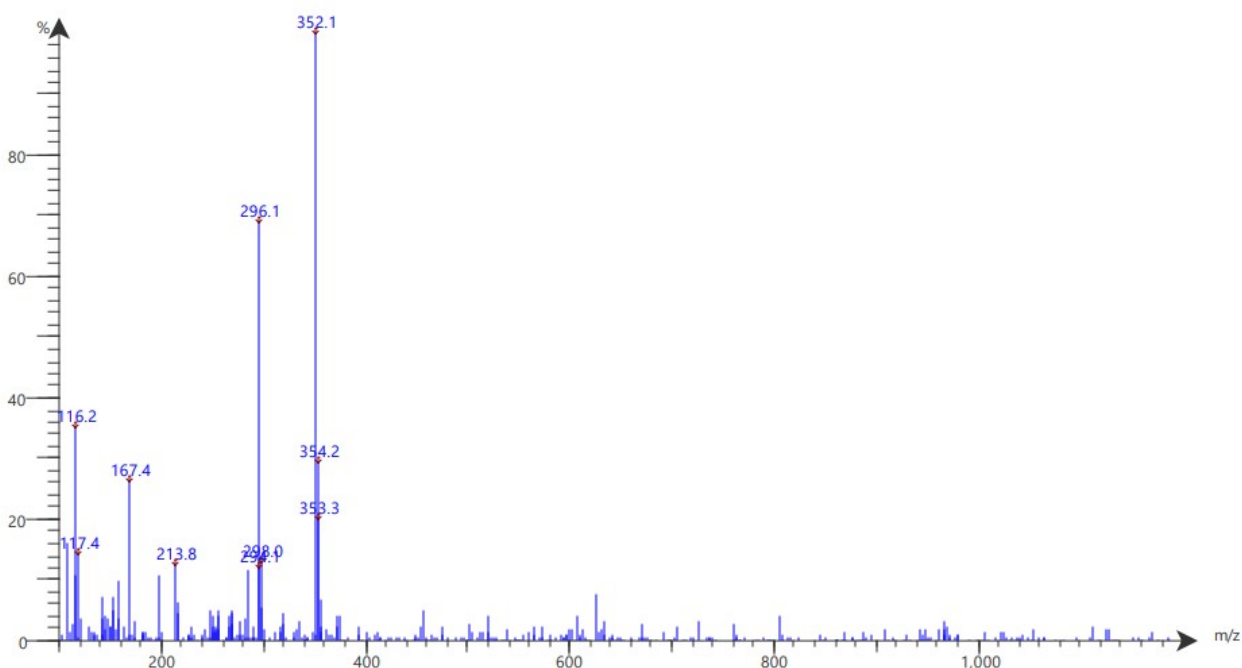

Spectrum RT 0.30 - 0.41 (7 scans)  
Vd\_Scan1\_is1 2022.07.07 10:17:06 ;  
APCI + Max: 8.7E8

Intensity

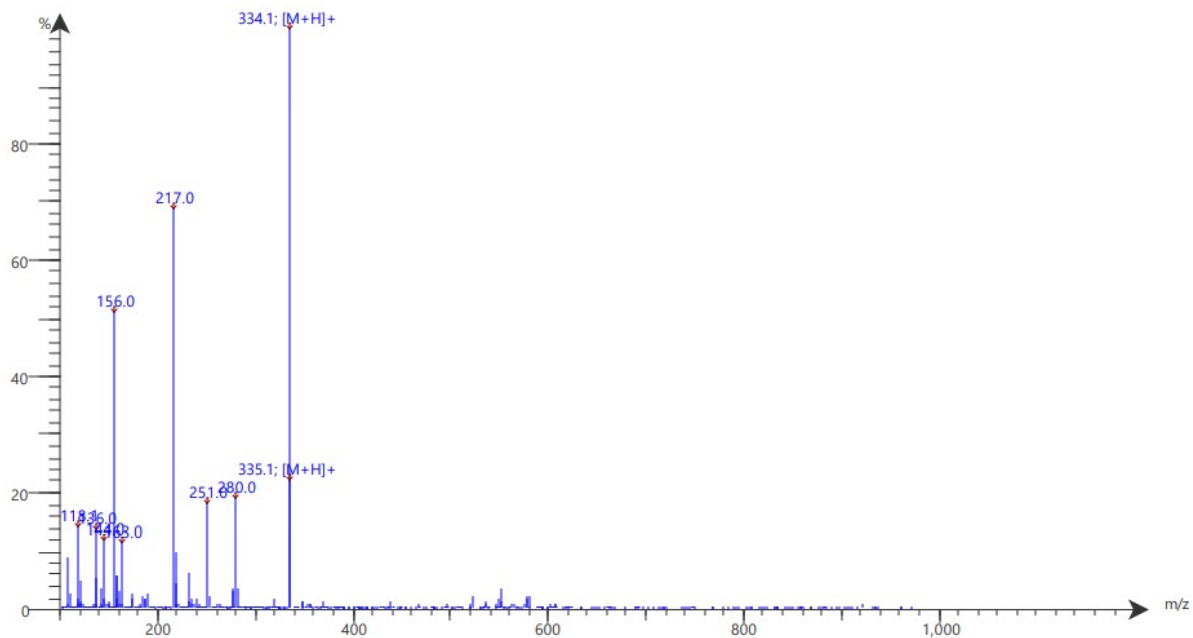

Spectrum RT 0.28 - 0.35 (5 scans)  
Ve\_Scan1\_is1 2022.07.07 10:19:07 ;  
APCI + Max: 2.3E8

Intensity

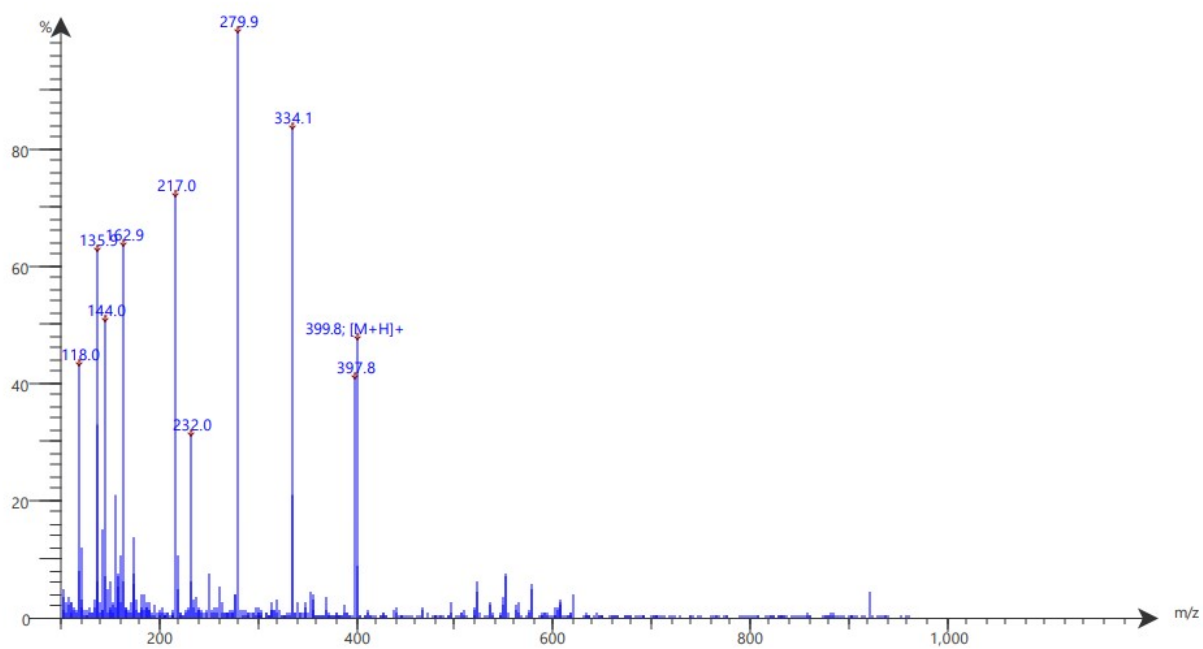

Spectrum RT 5.88 - 6.28 (24 scans)  
Vf\_Scan1\_is1 2022.07.07 10:21:10 ;  
APCI + Max: 1.9E8

Intensity

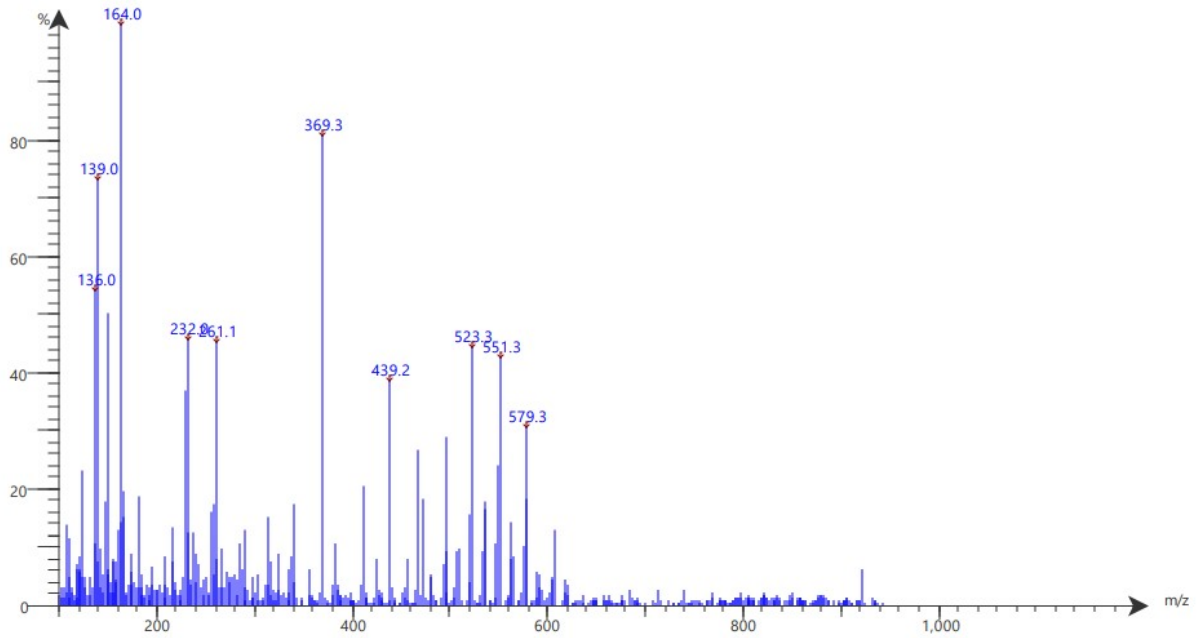

Spectrum RT 0.37 - 0.46 (6 scans)  
Vh\_Scan1\_is1 2022.07.07 10:33:16 ;  
APCI + Max: 1.7E8

Intensity

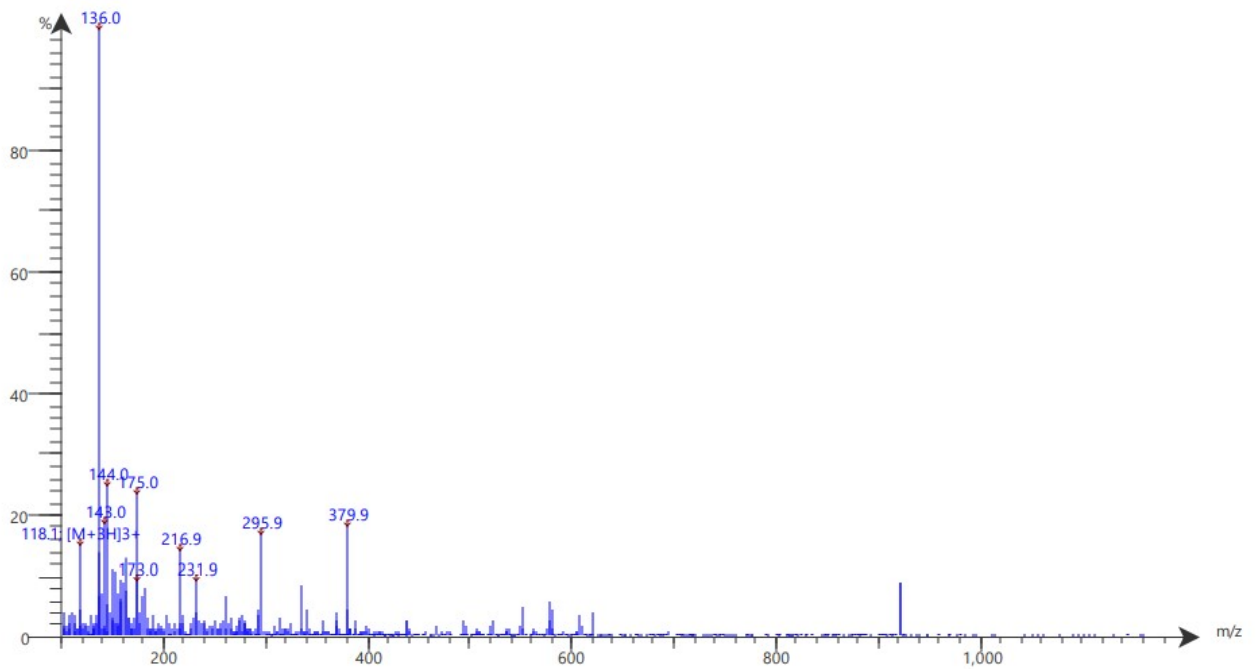

Spectrum RT 0.41 - 0.48 (5 scans)  
Vj\_Scan1\_is1 2022.07.07 10:48:56 ;  
APCI +

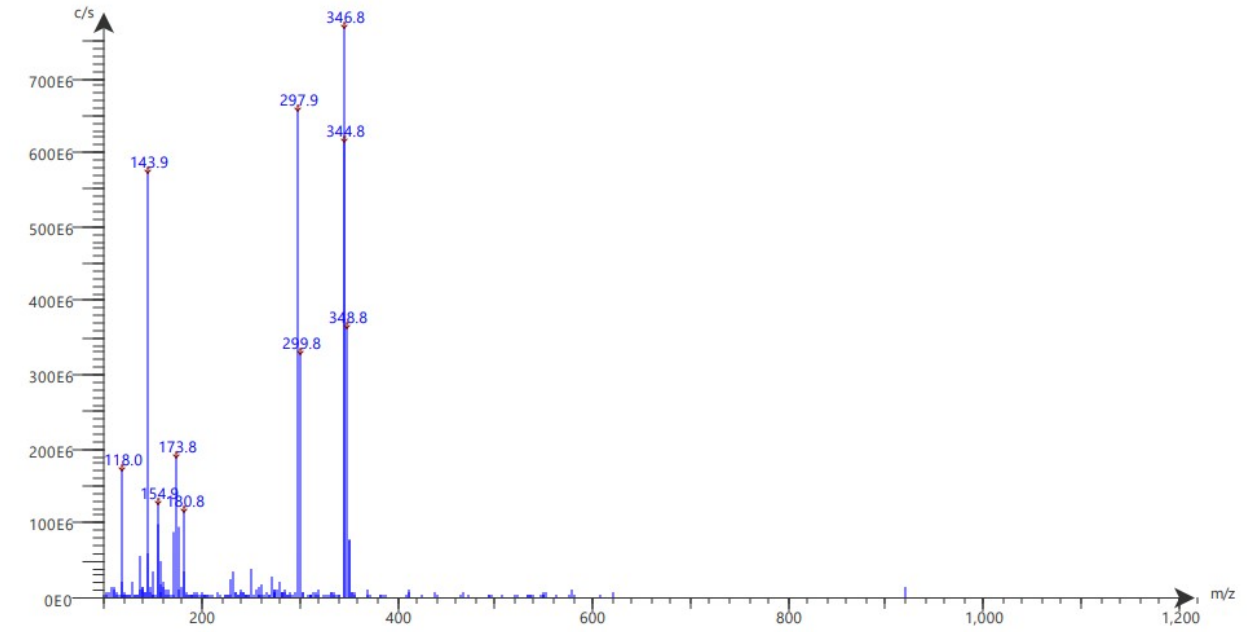

Spectrum RT 0.32 - 0.39 (5 scans)  
VM\_Scan1\_is1 2022.07.07 11:09:58 ;  
APCI +

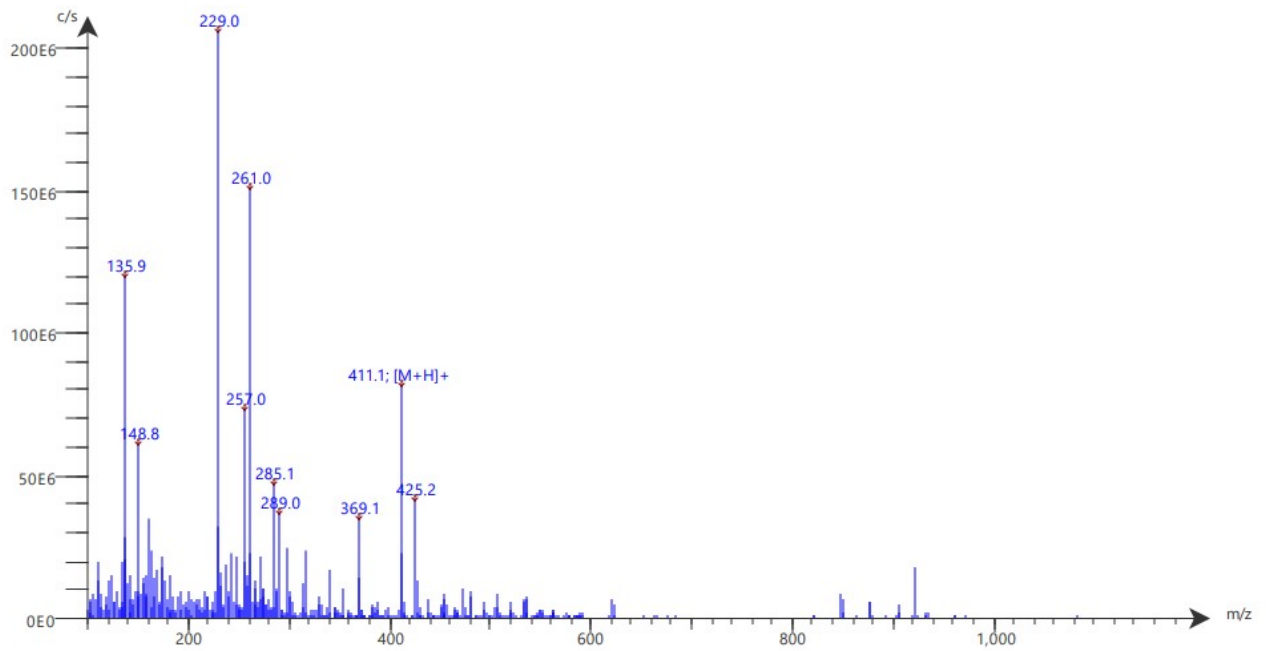

Spectrum RT 0.34 - 0.44 (7 scans)  
VN\_Scan1\_is1 2022.07.07 11:08:00 ;  
APCI +

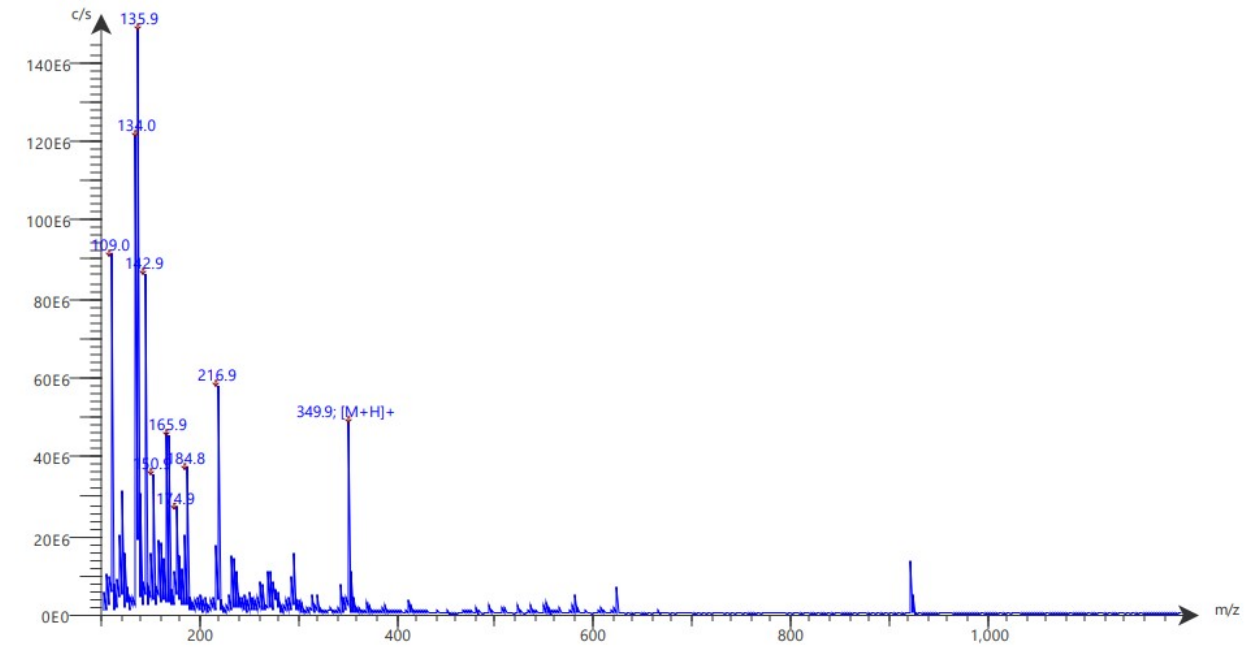

Supplement: d3md00524k1.pdf [file d3md00524k1.pdf]
