# Supplementary figures and images for: Novel indolyl 1,2,4-triazole derivatives as potential anti-proliferative agents: in silico studies, synthesis, and biological evaluation
Source: Royal Society of Chemistry journal article supplement (doi:10.1039/d3md00524k), 2023-11-24

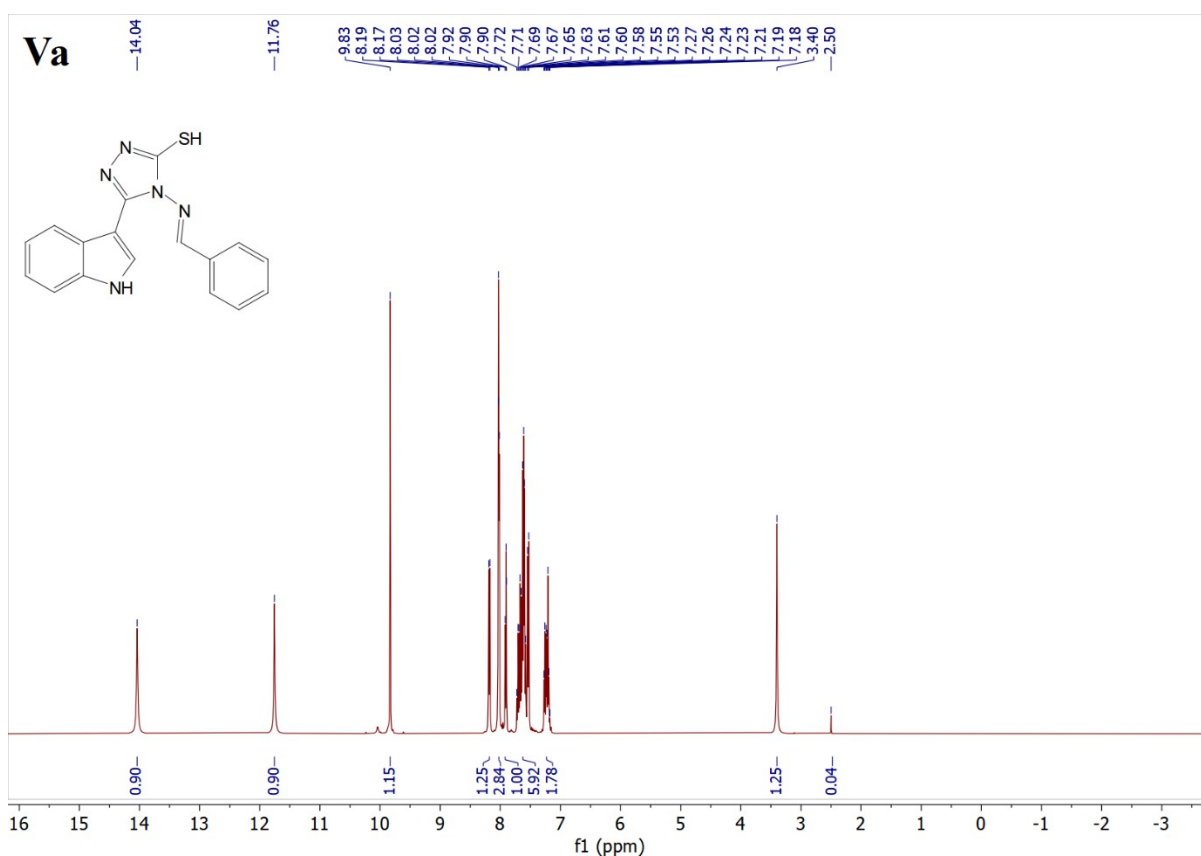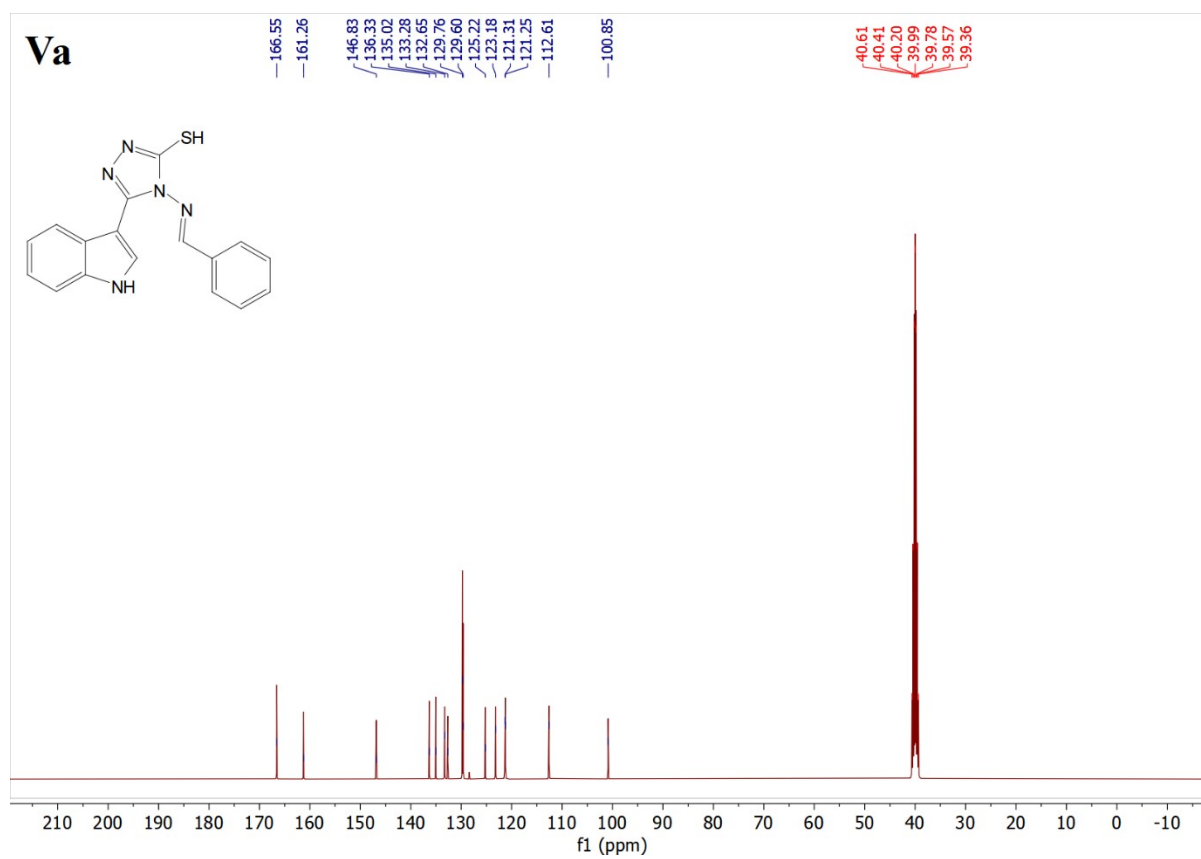

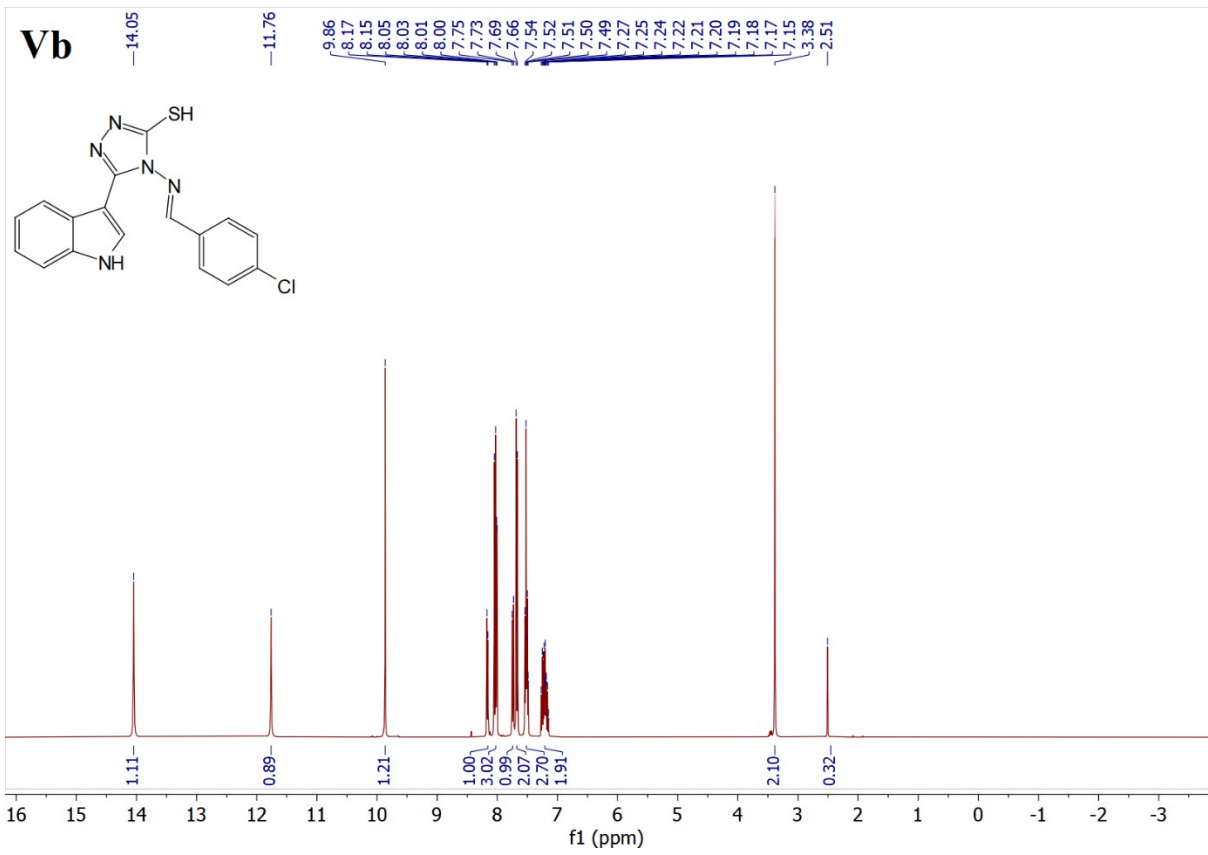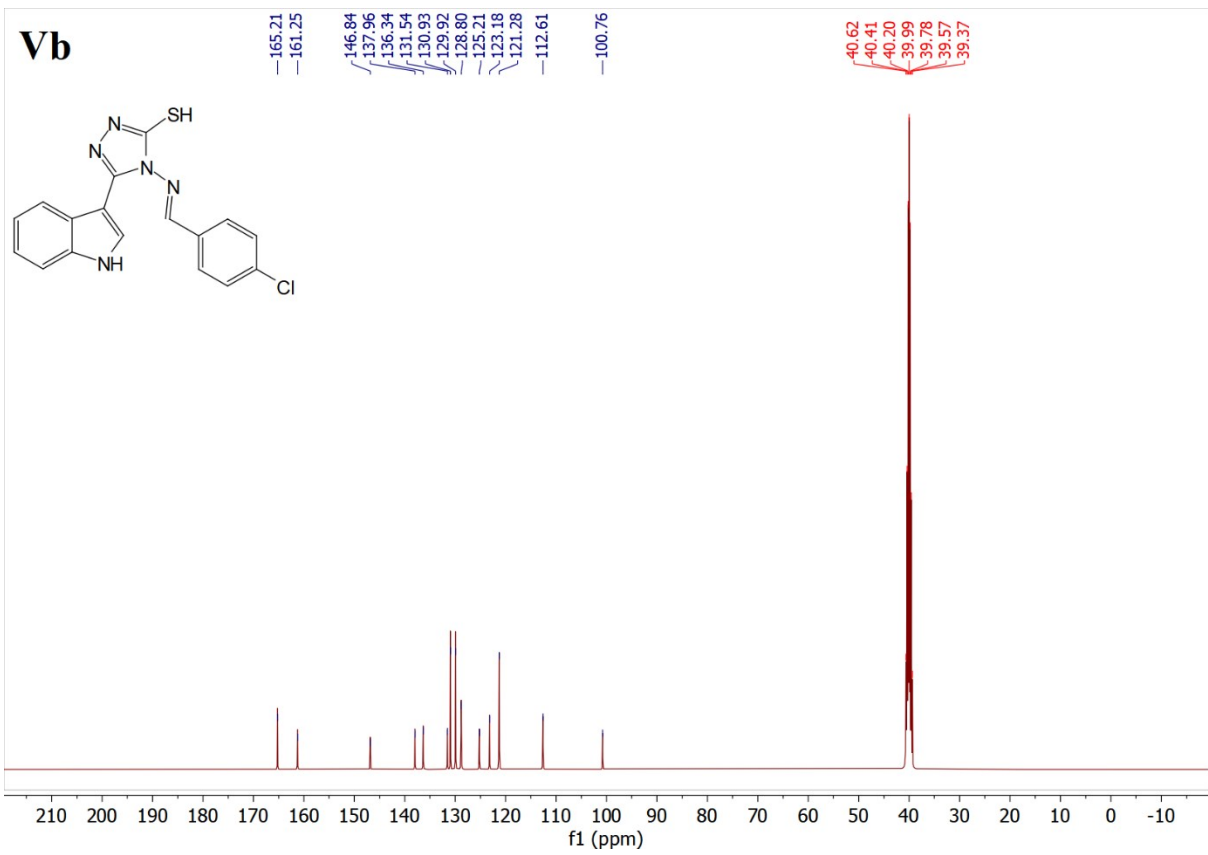

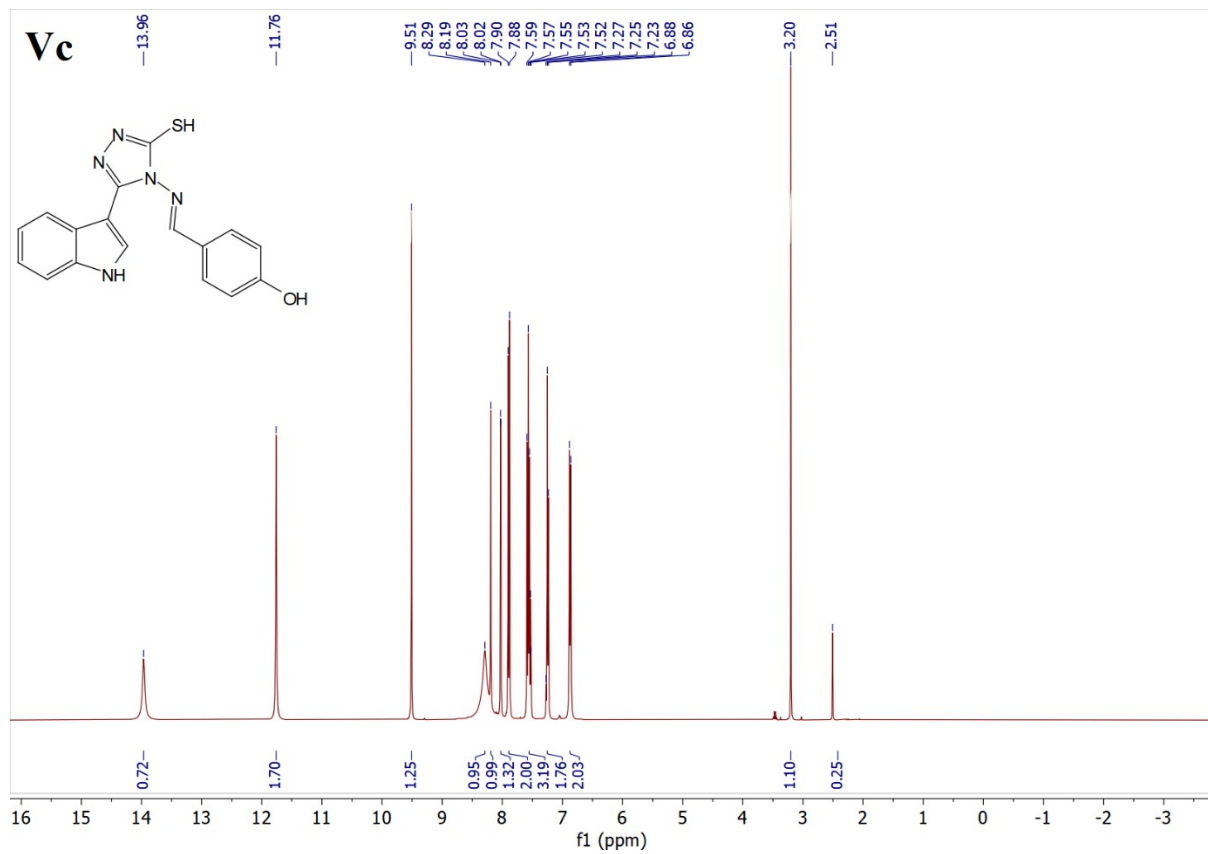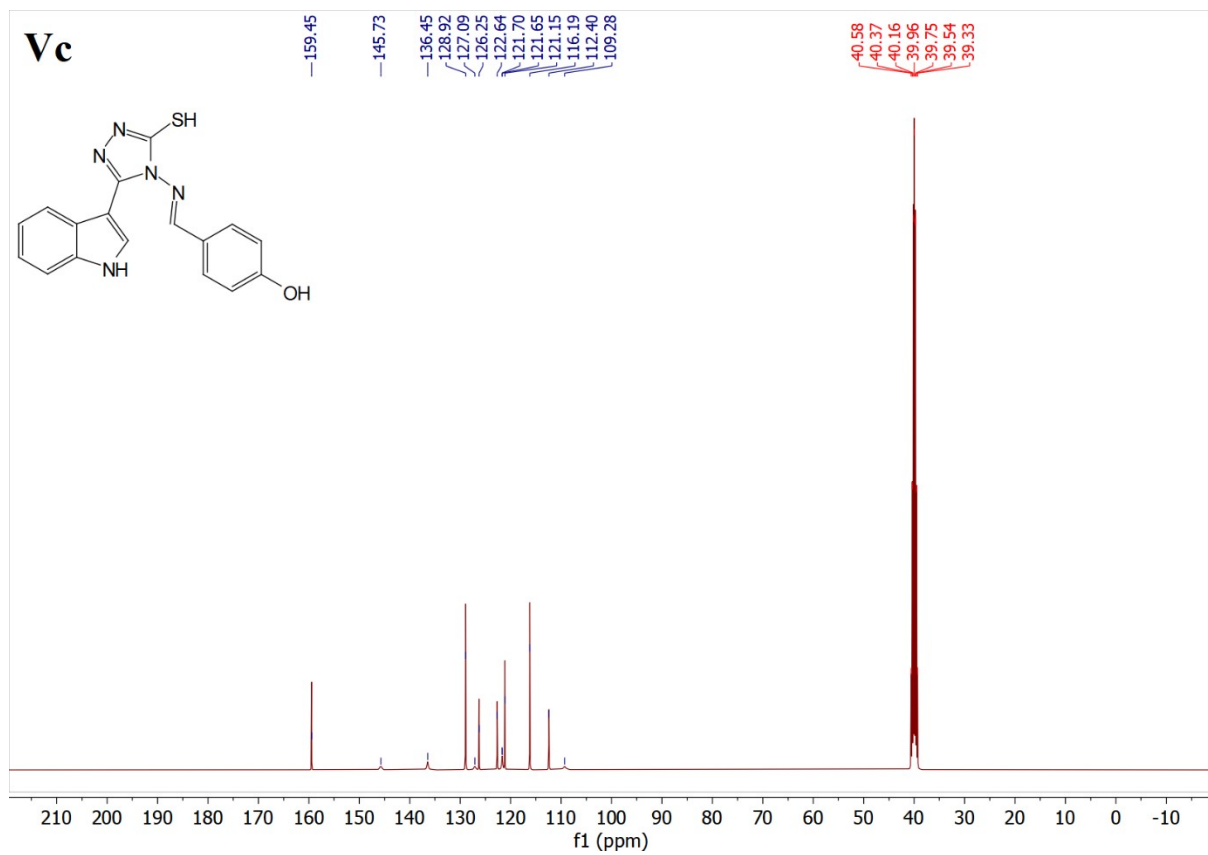

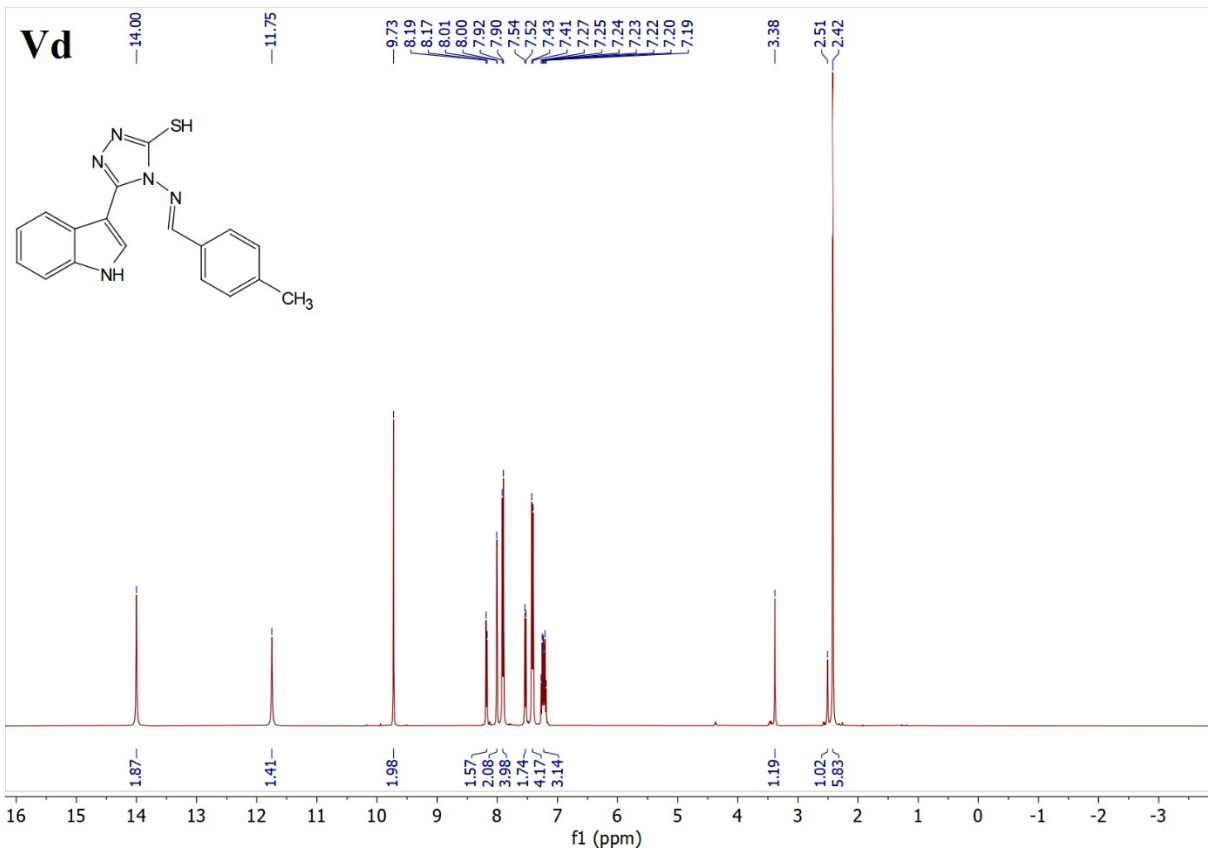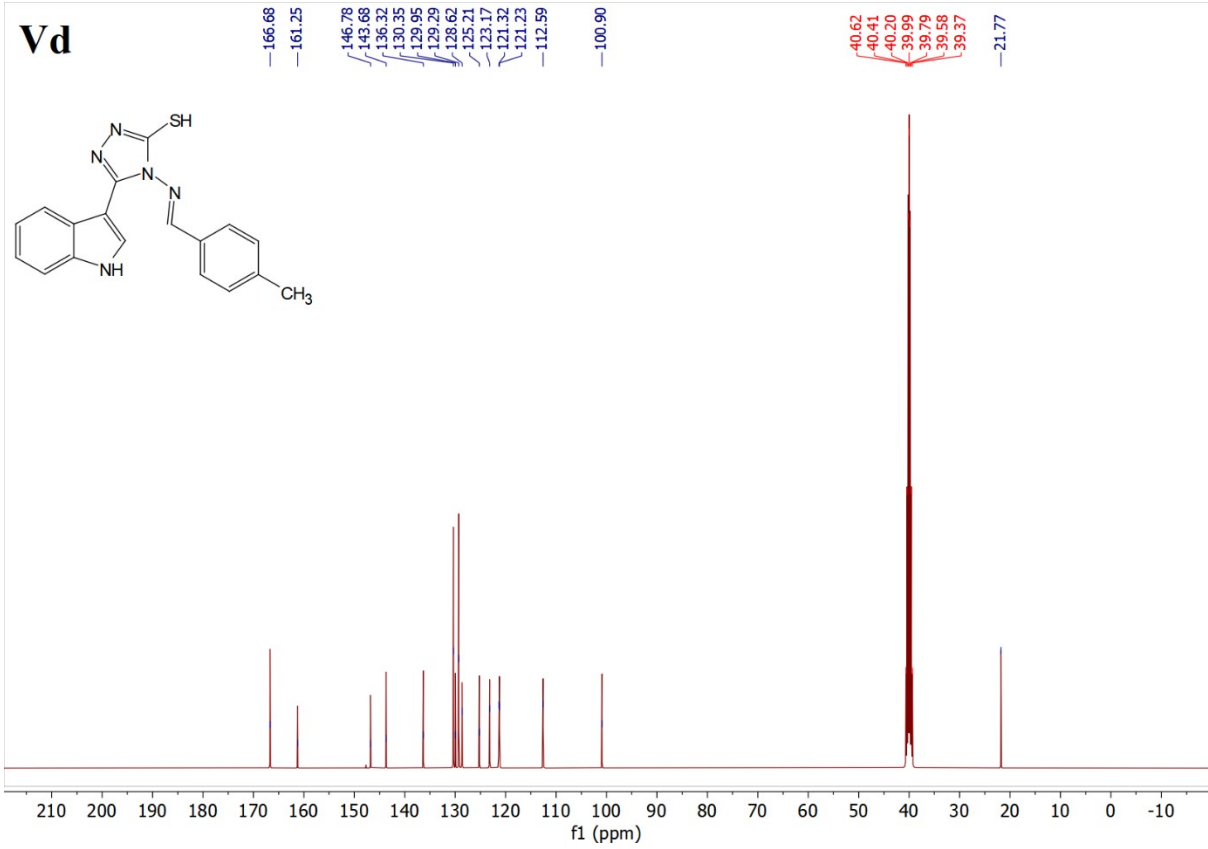

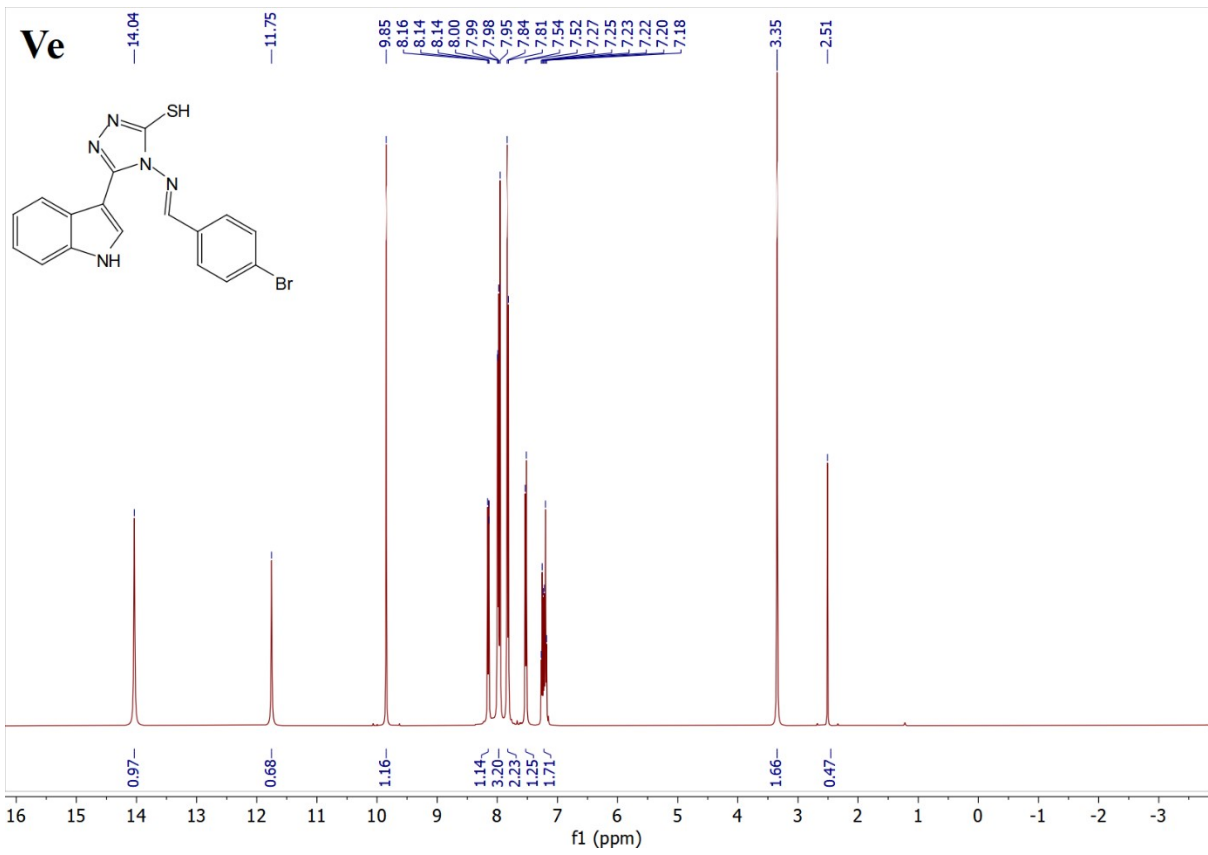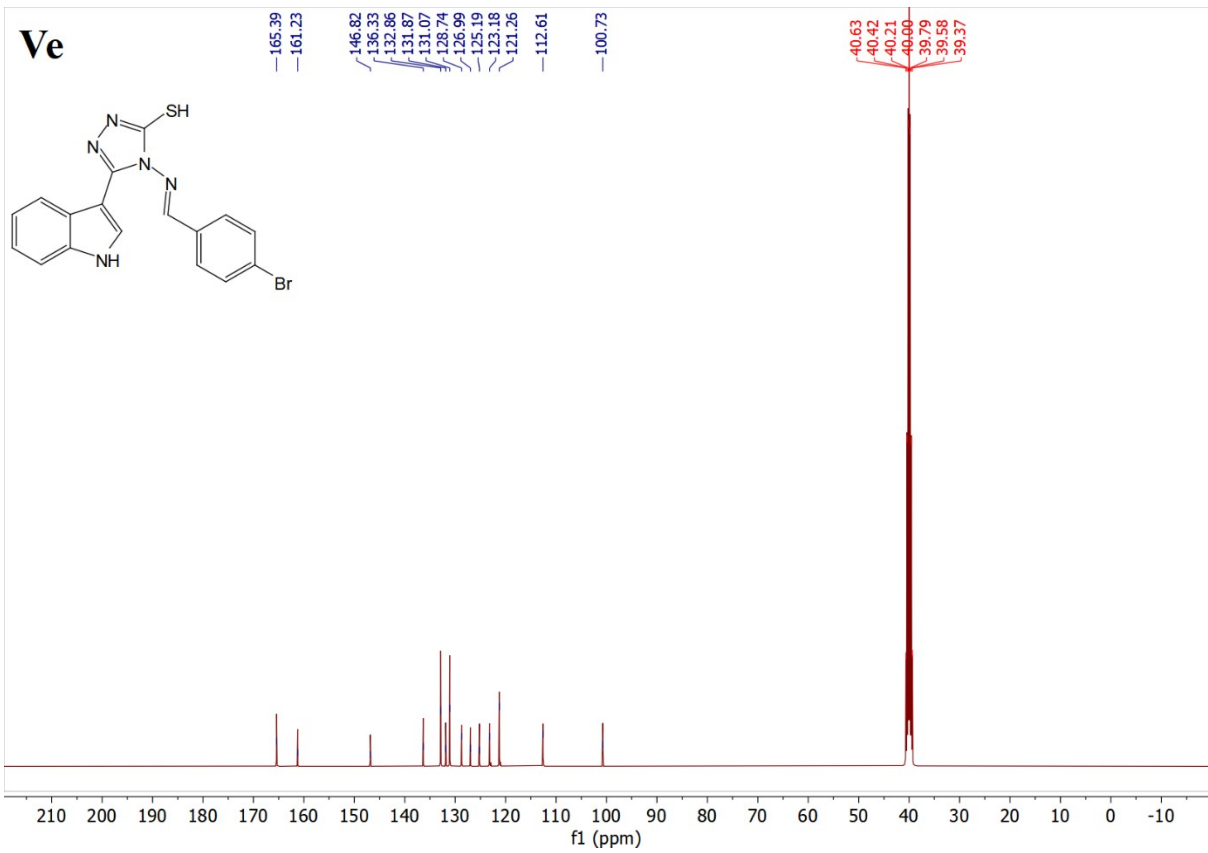

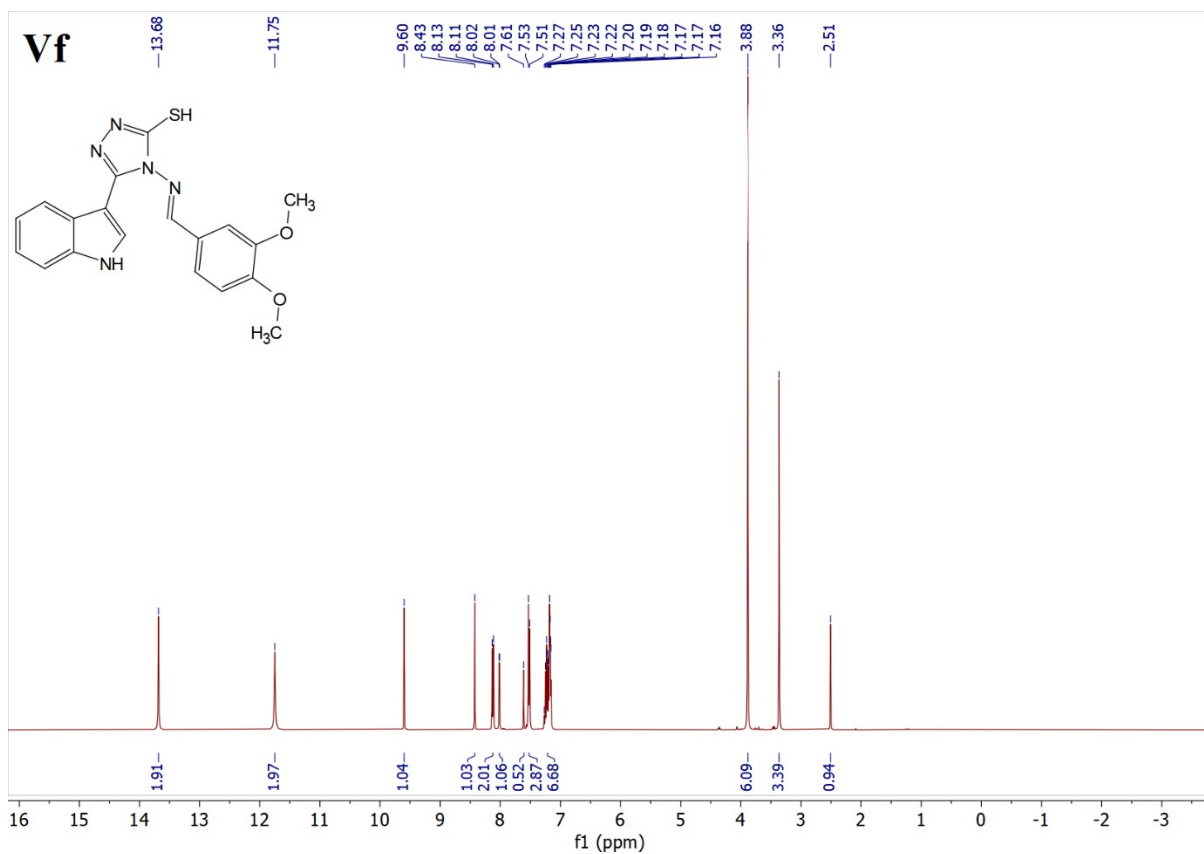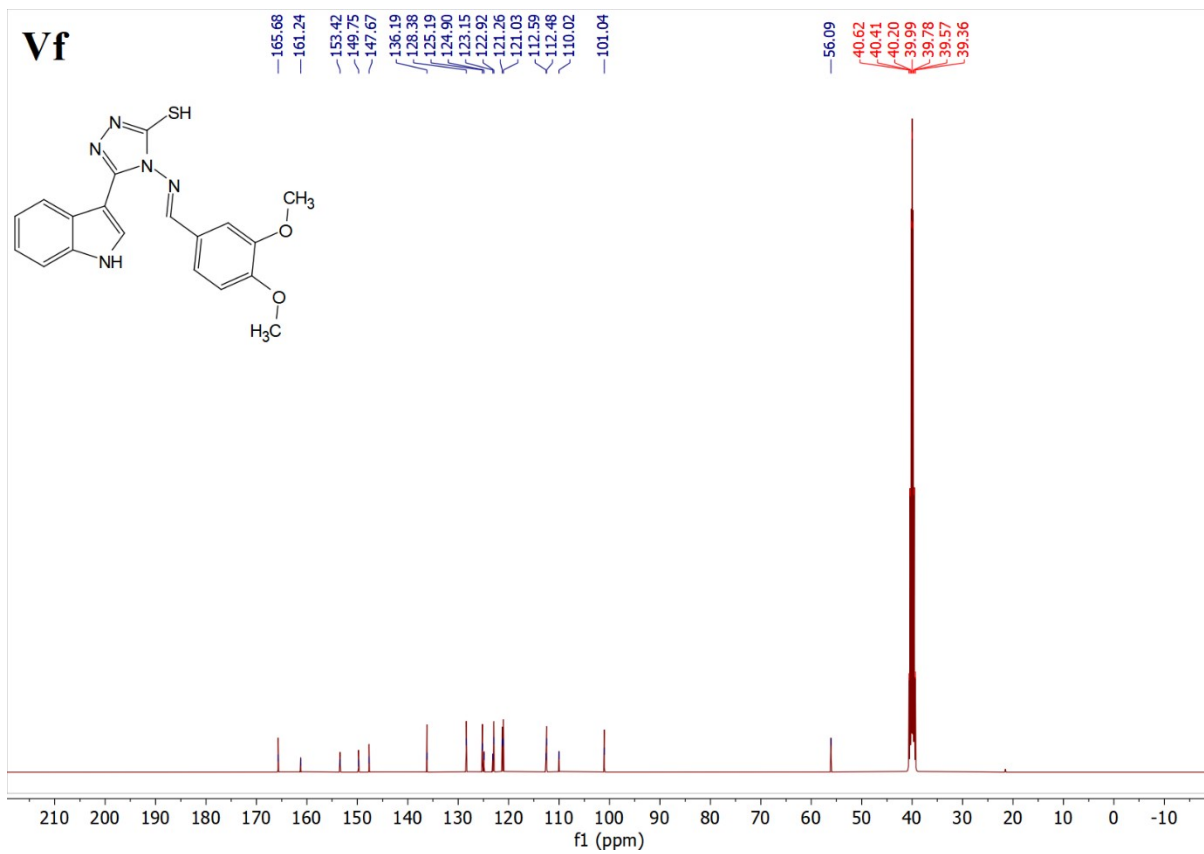

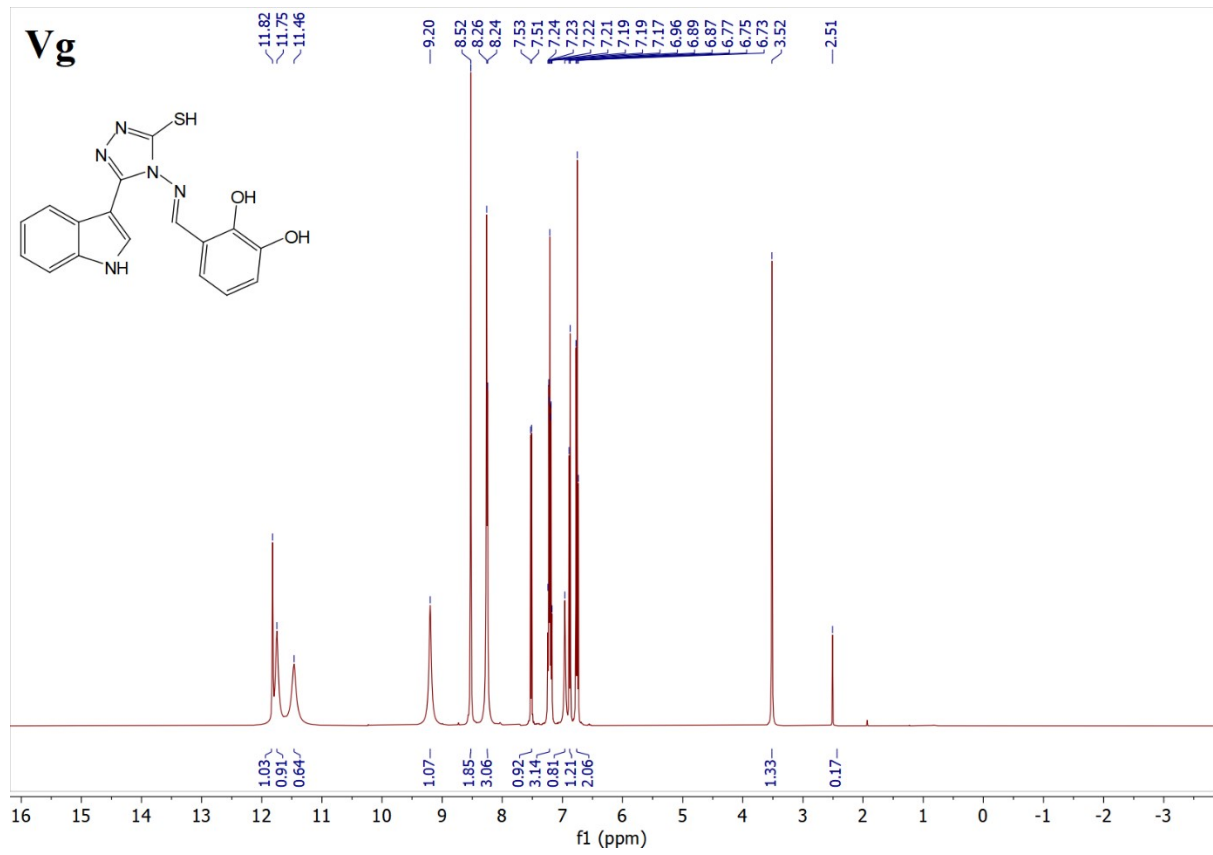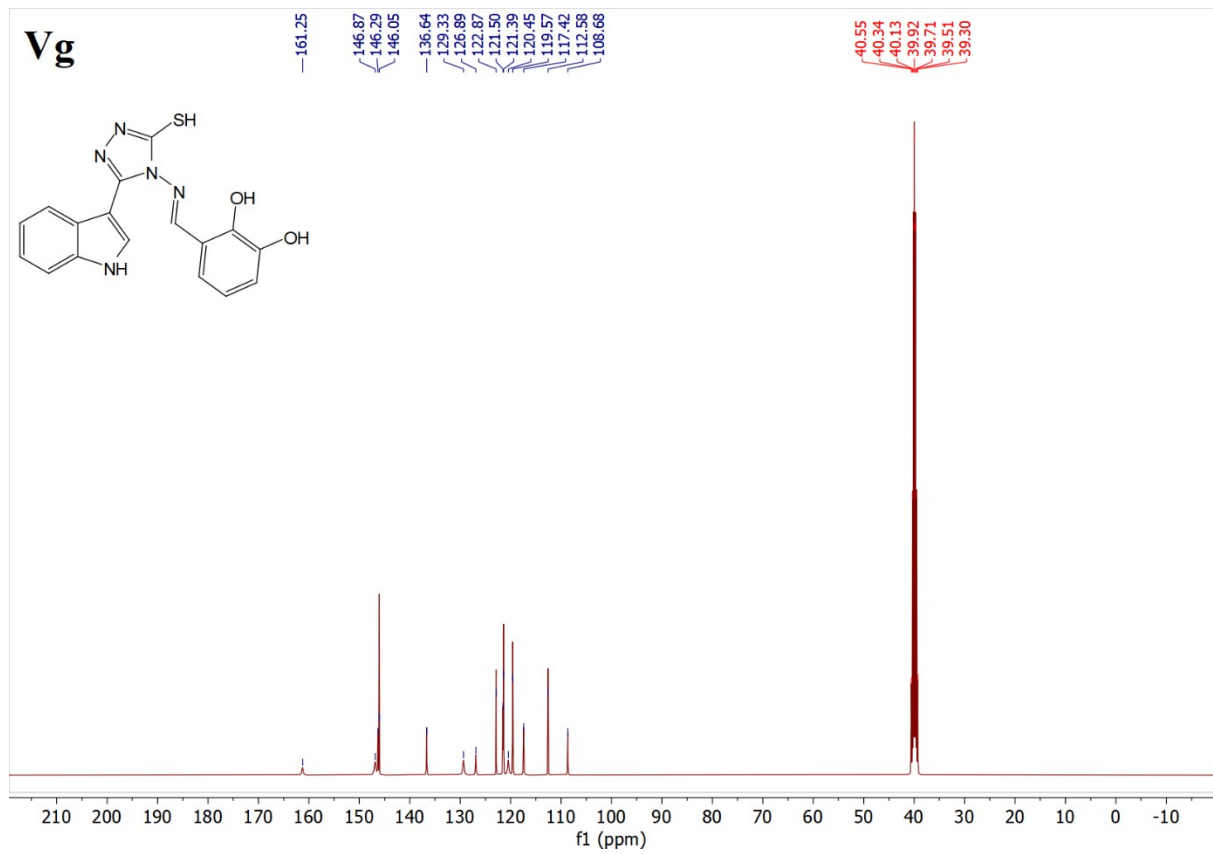

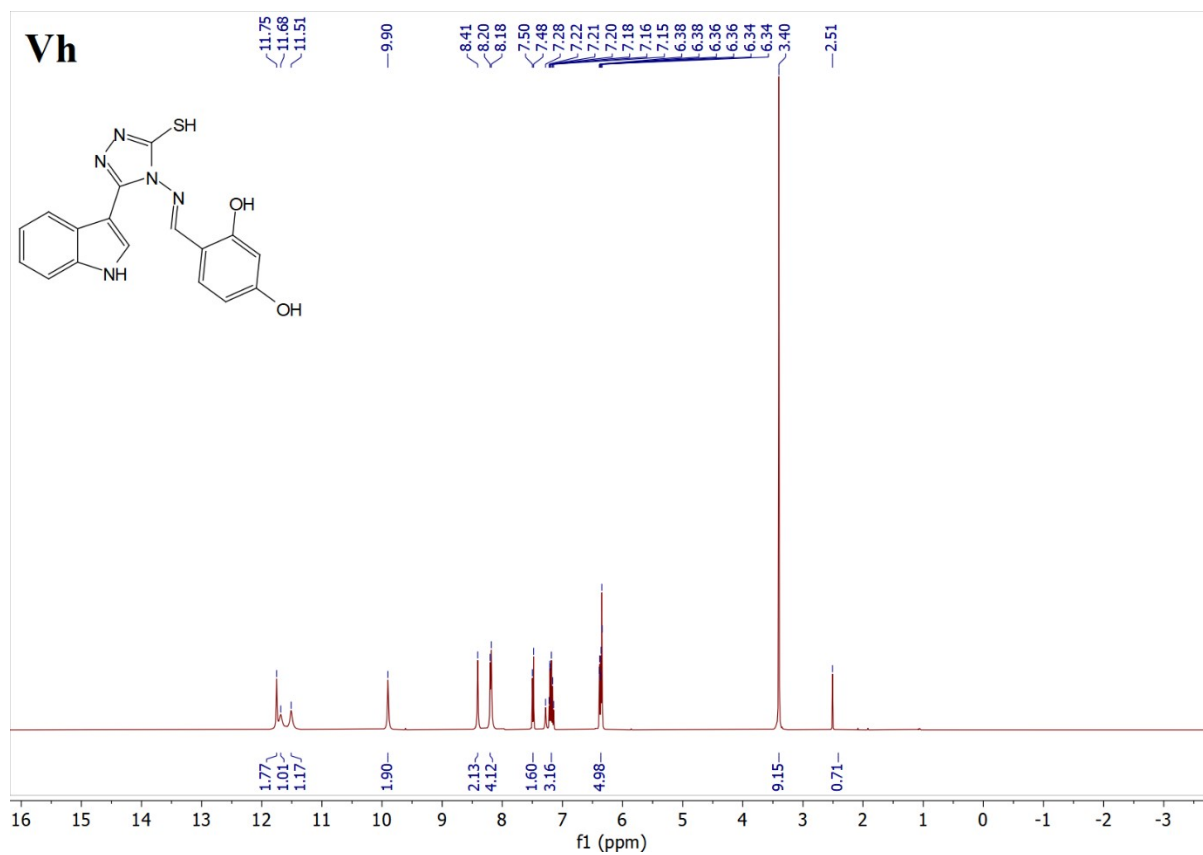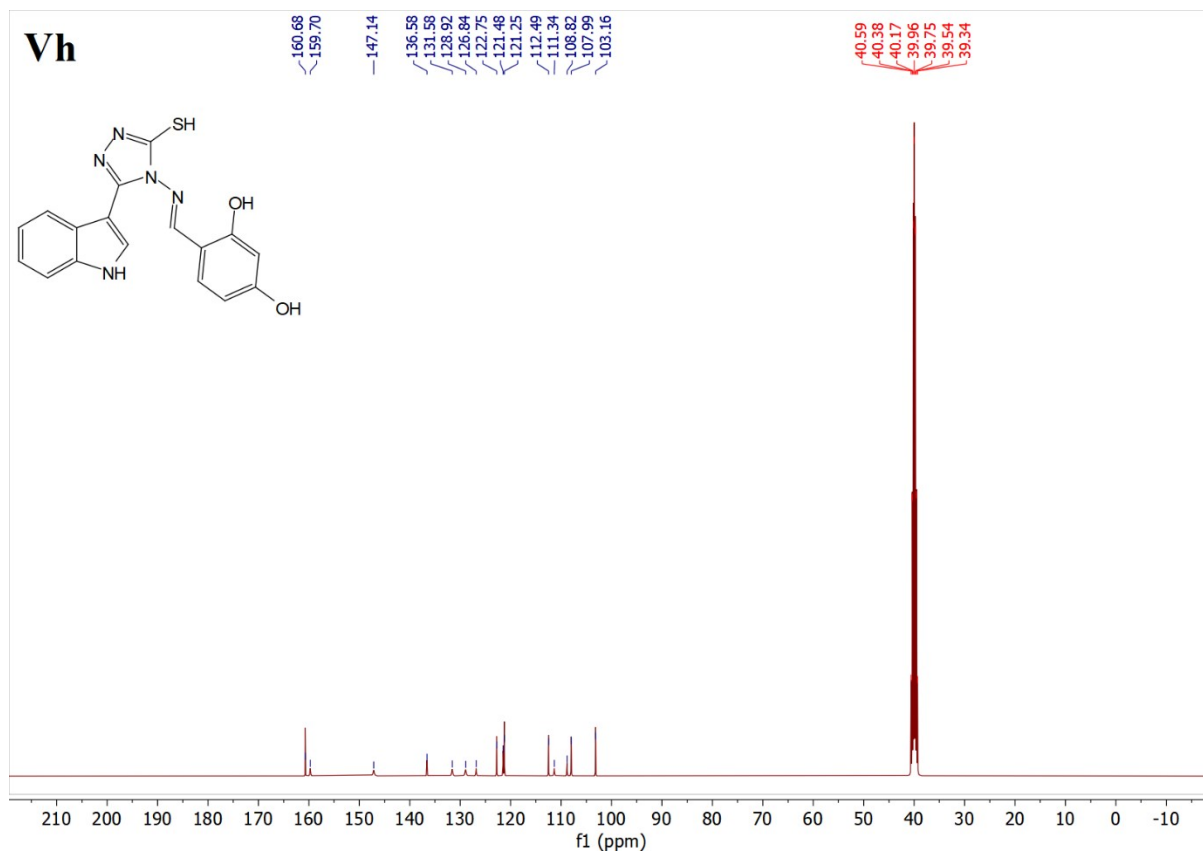



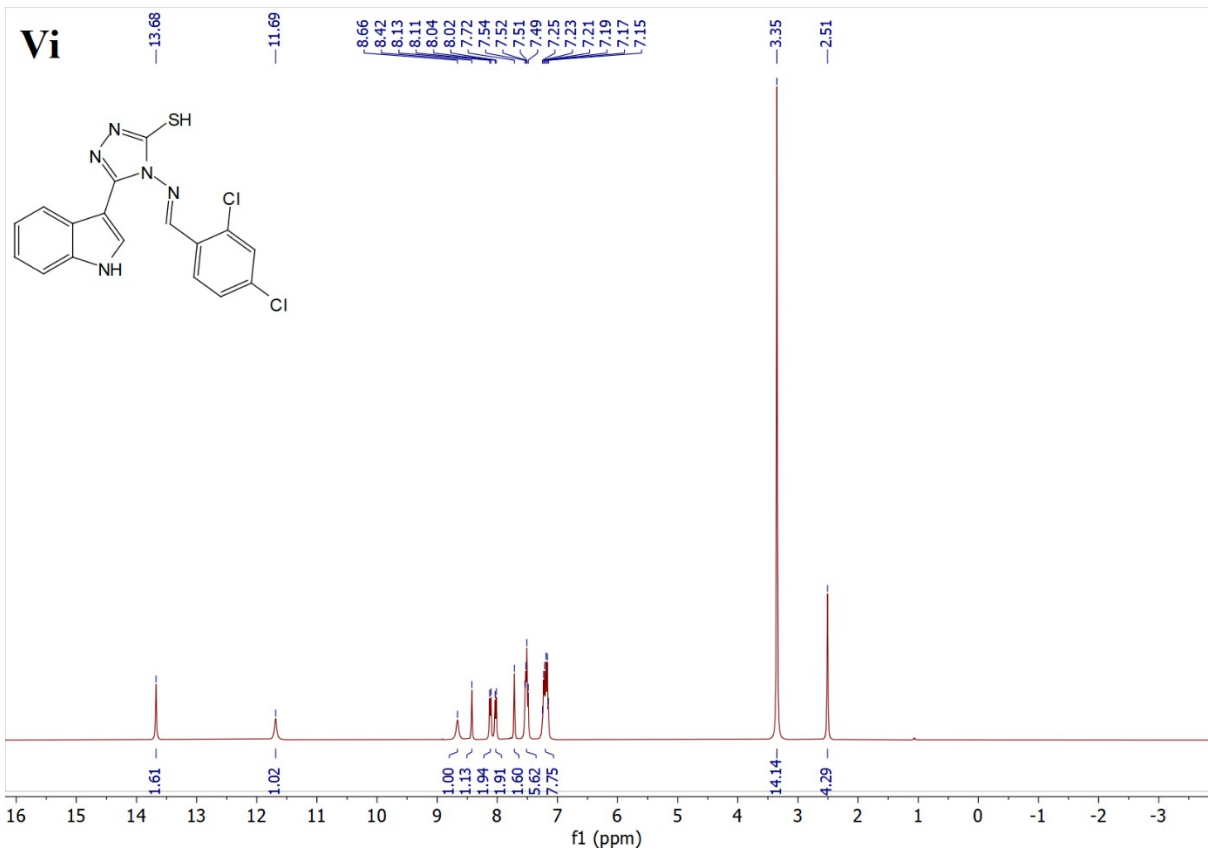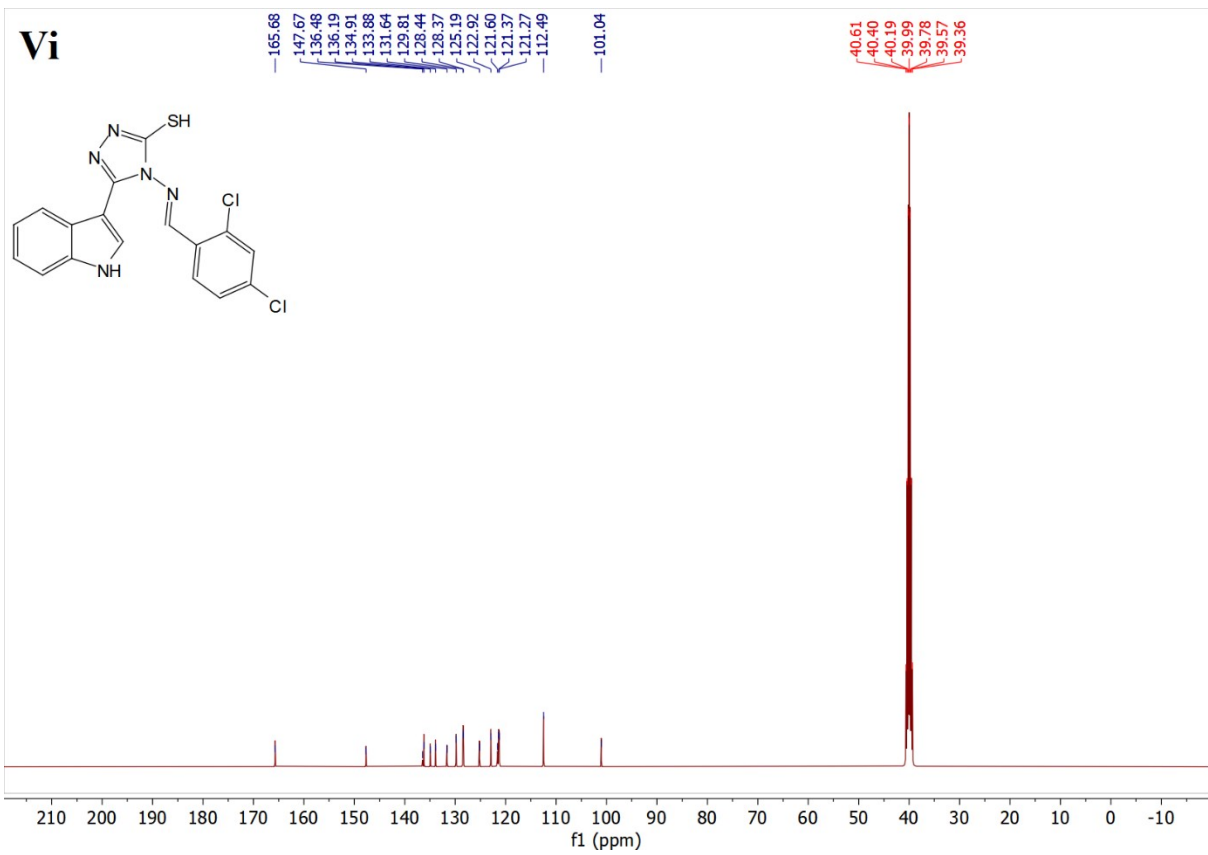

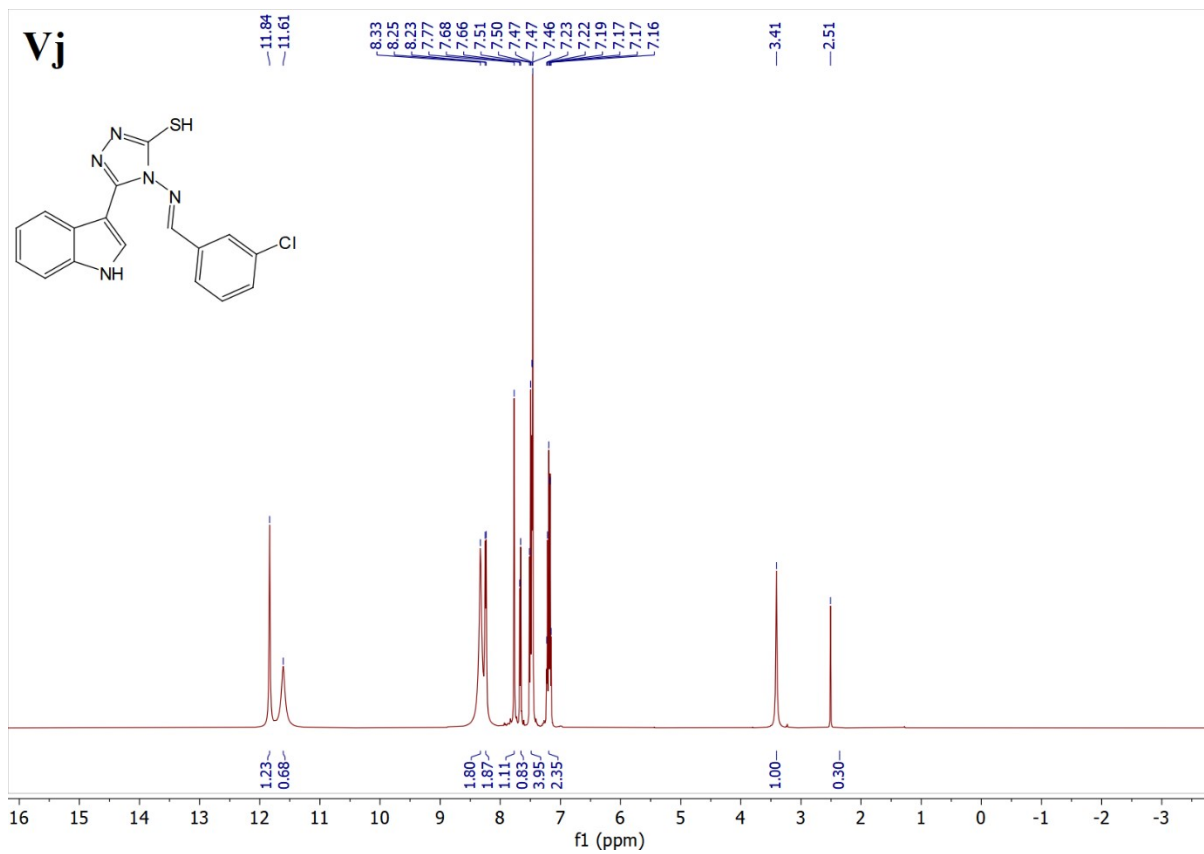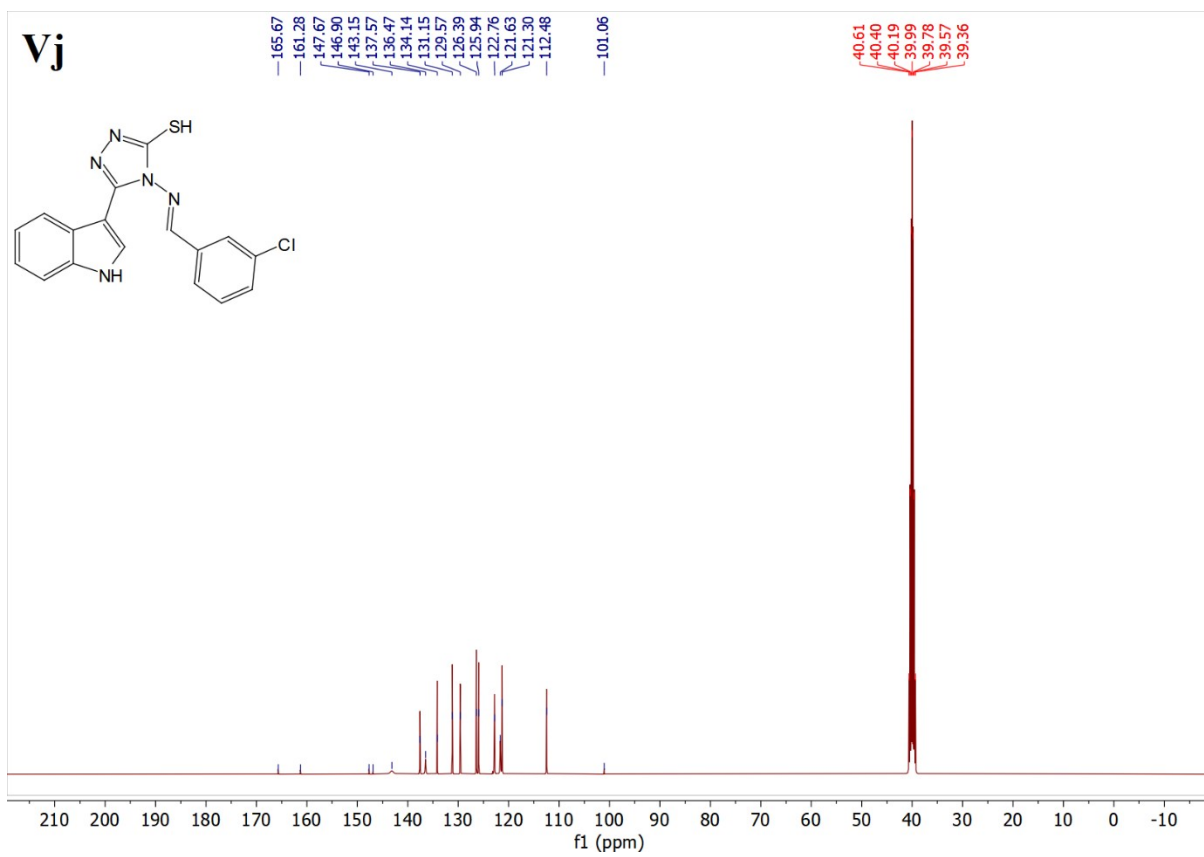

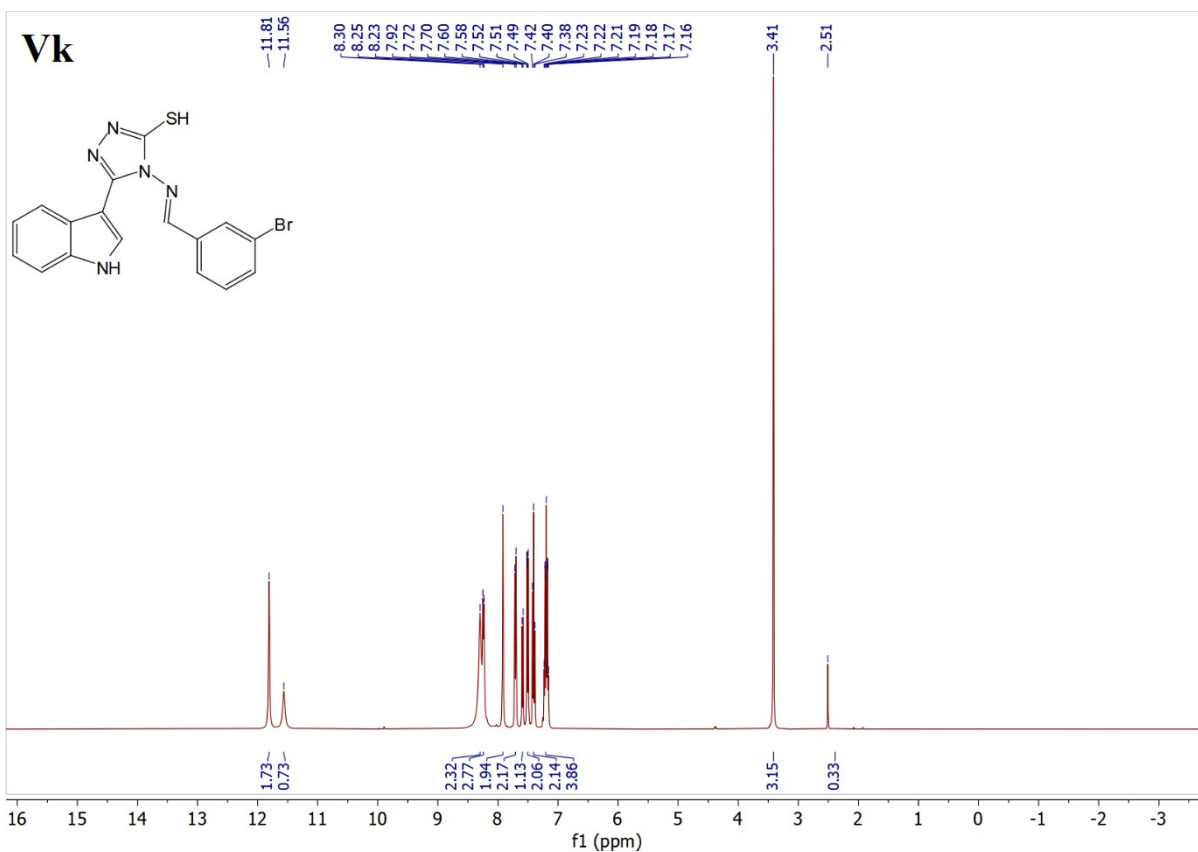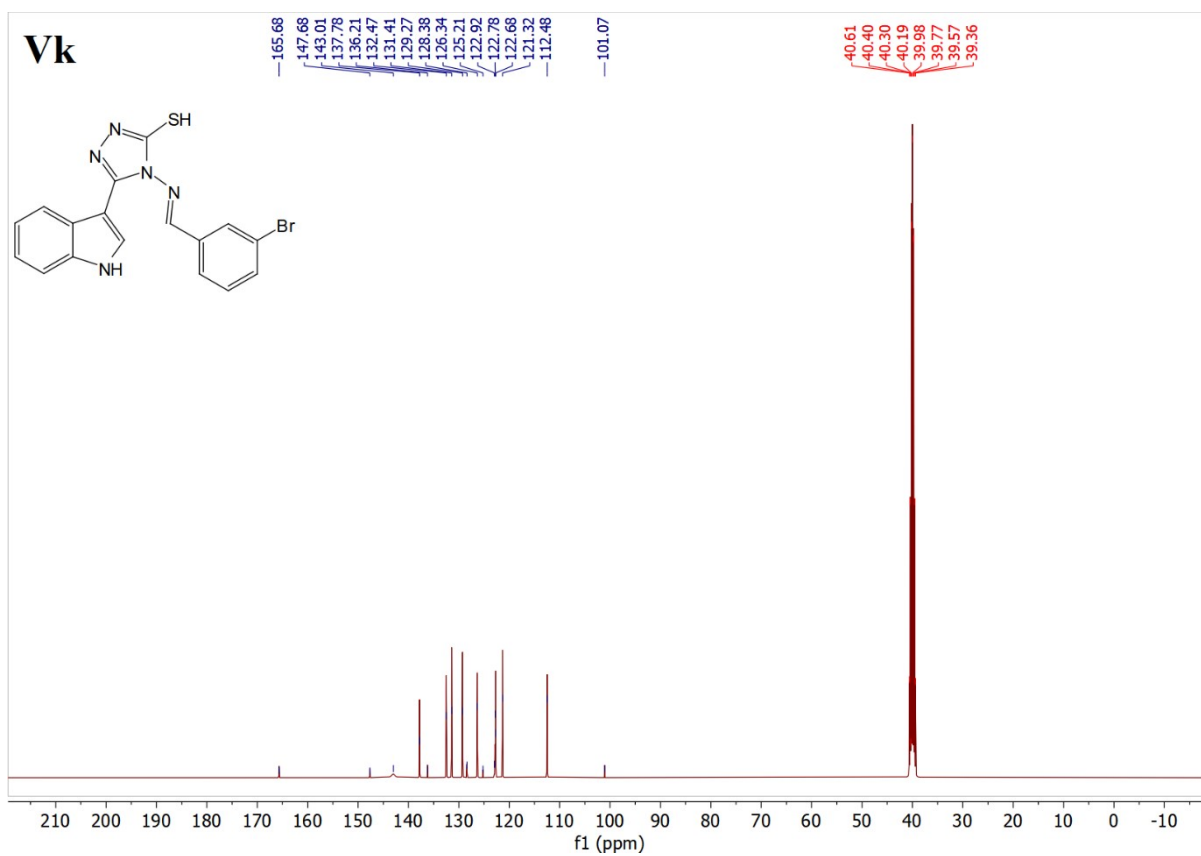

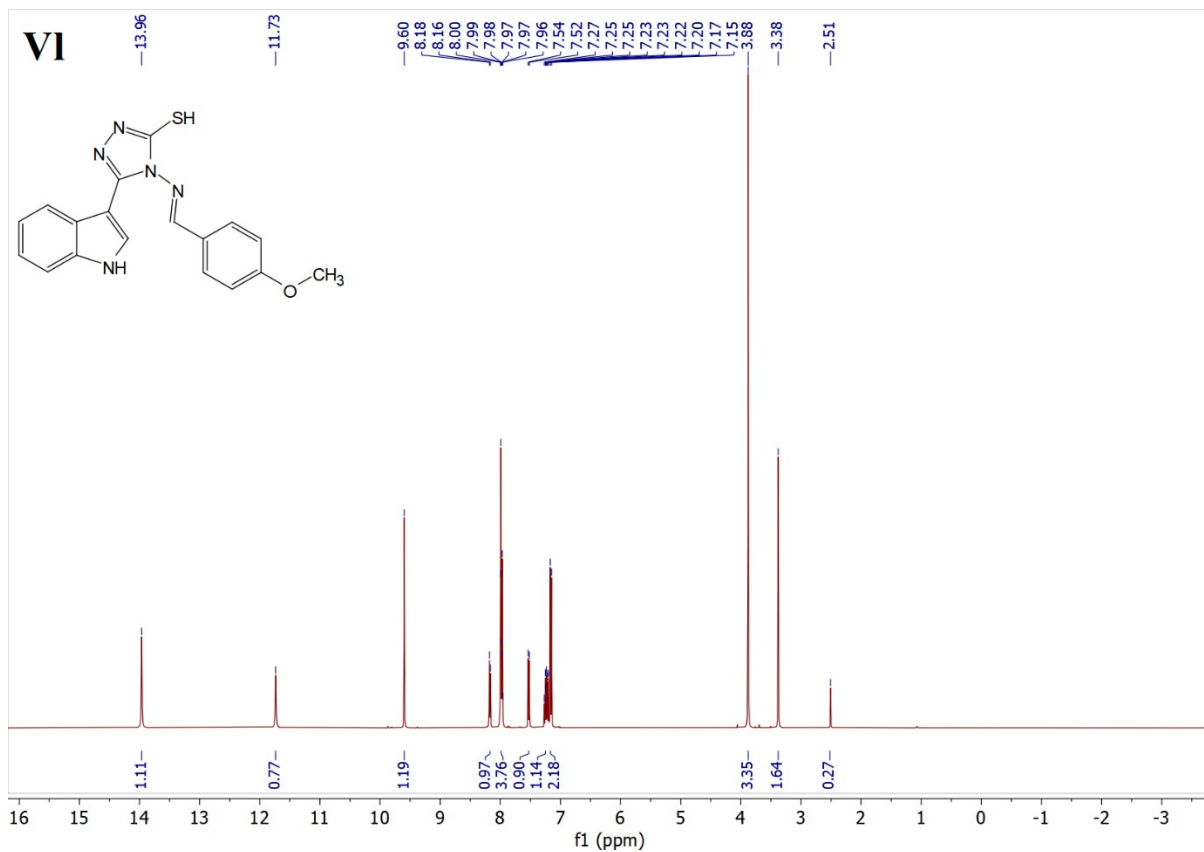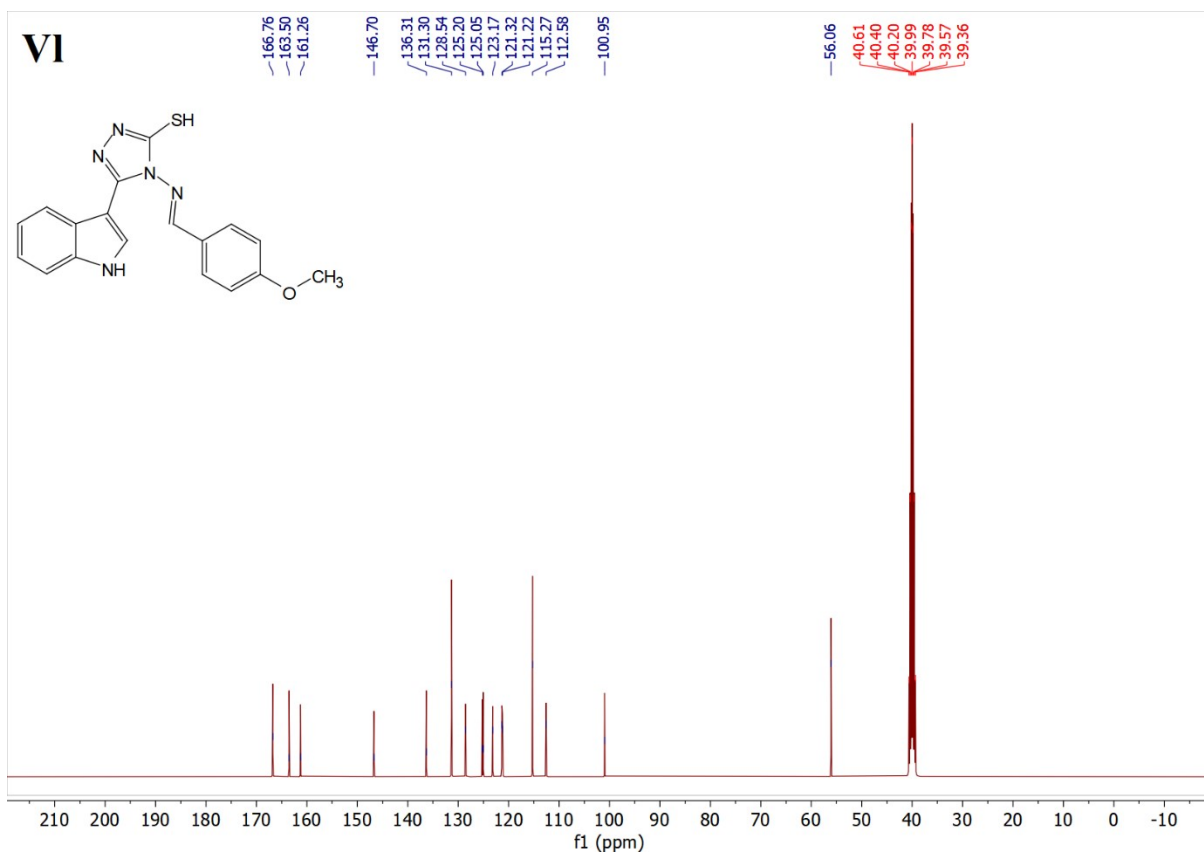

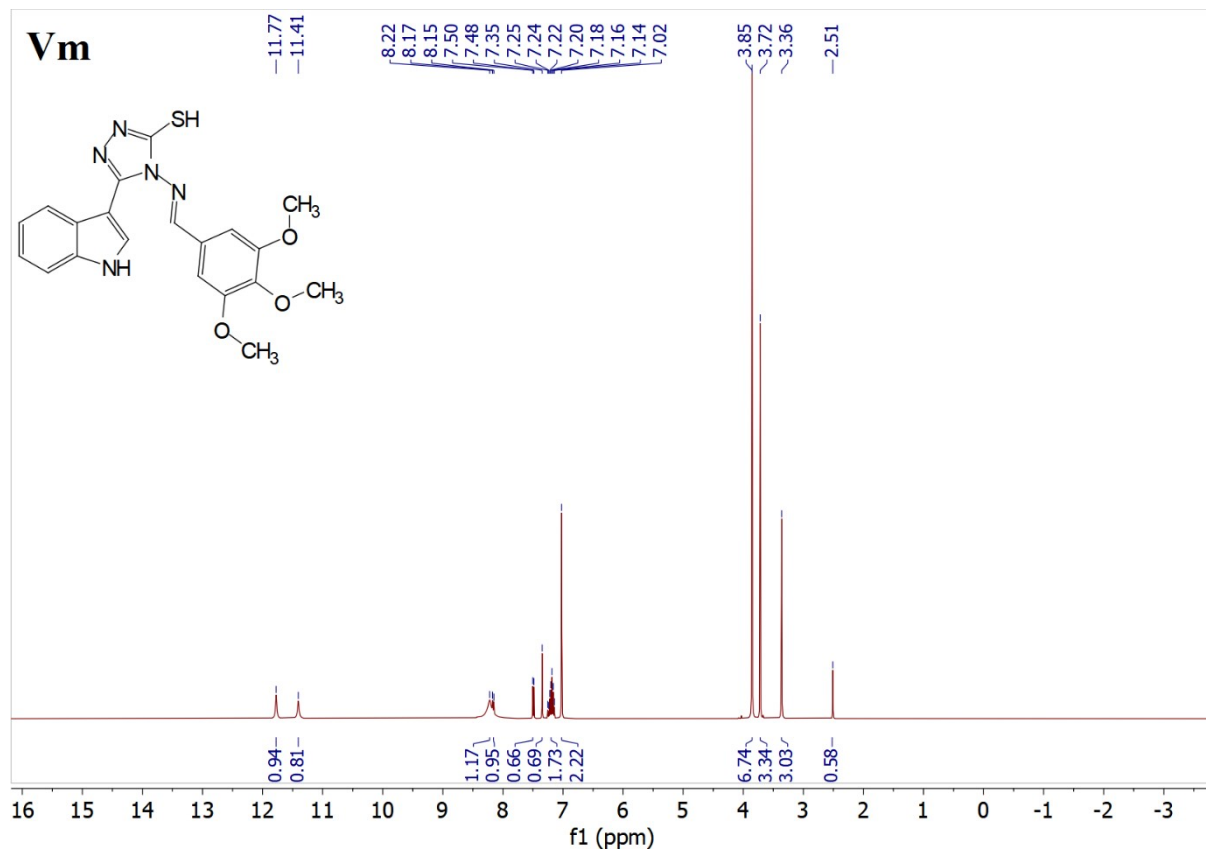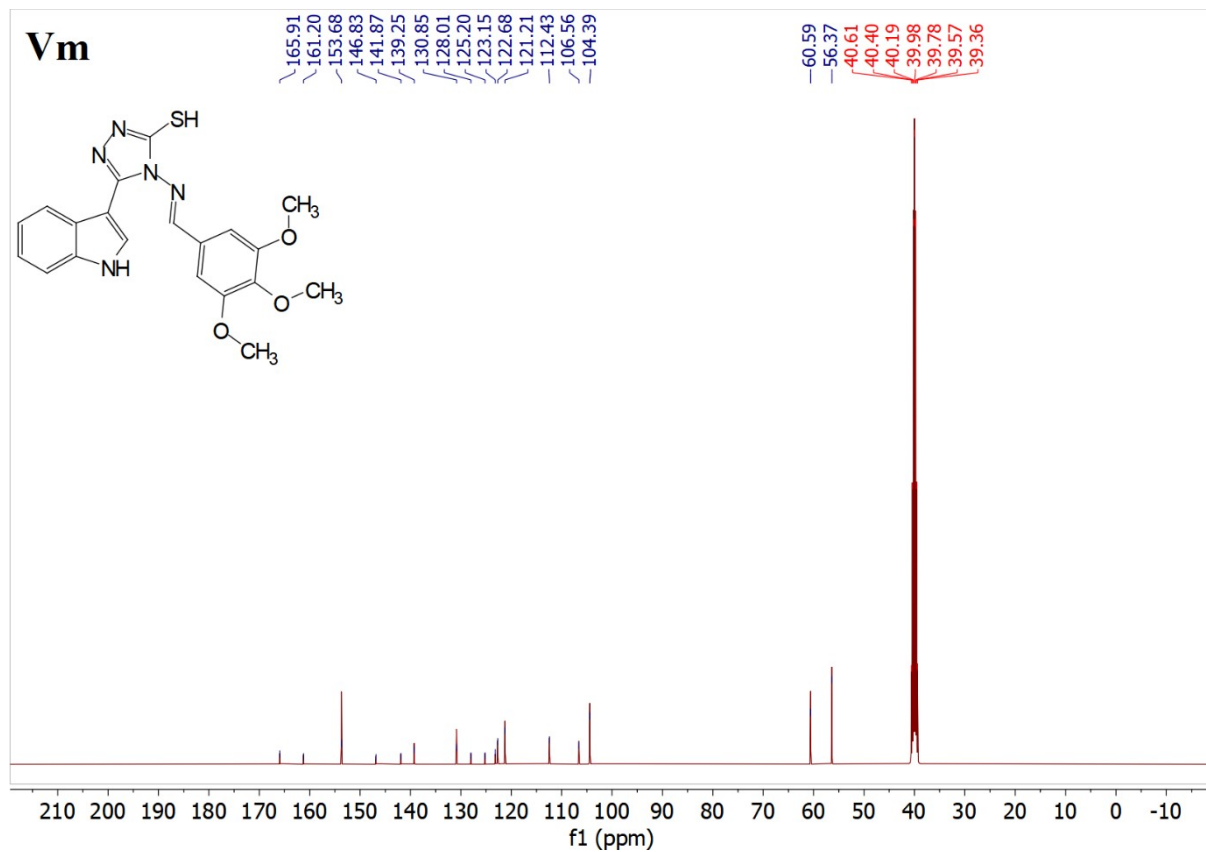

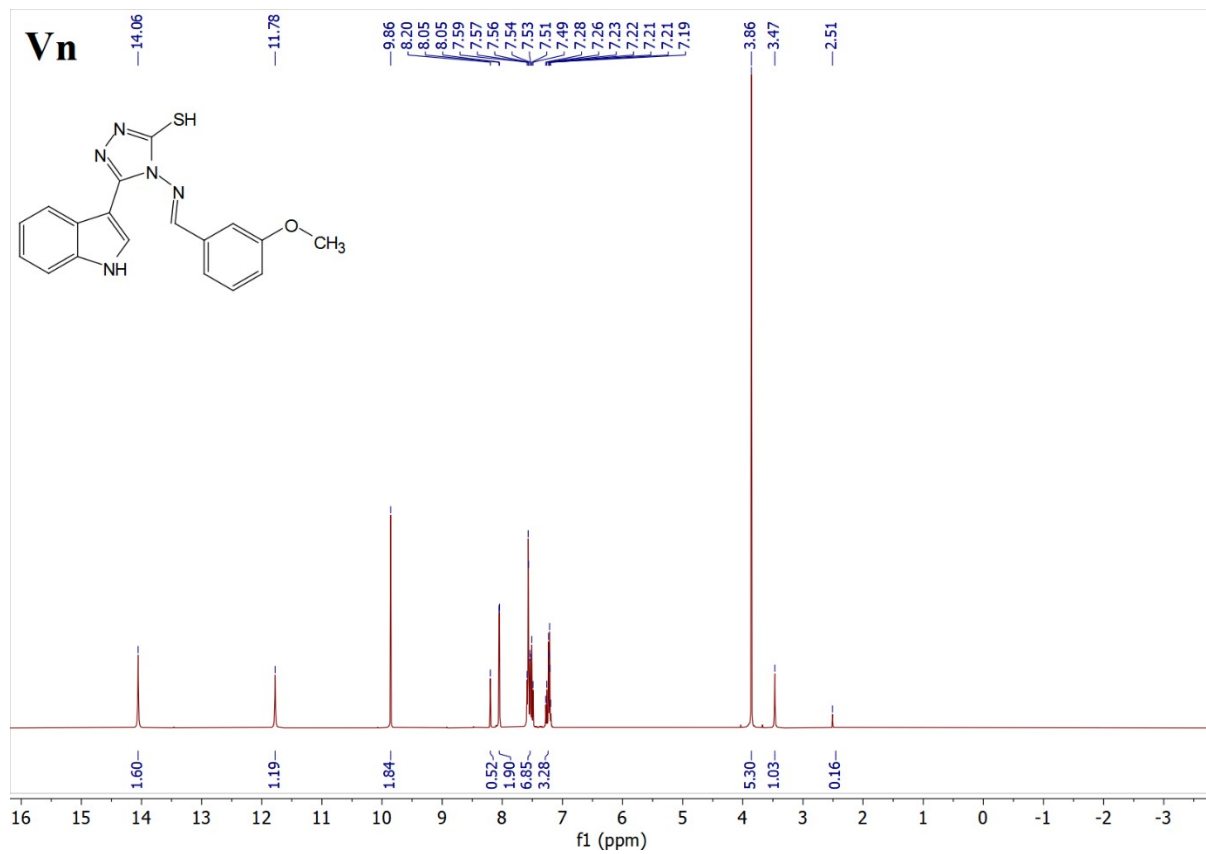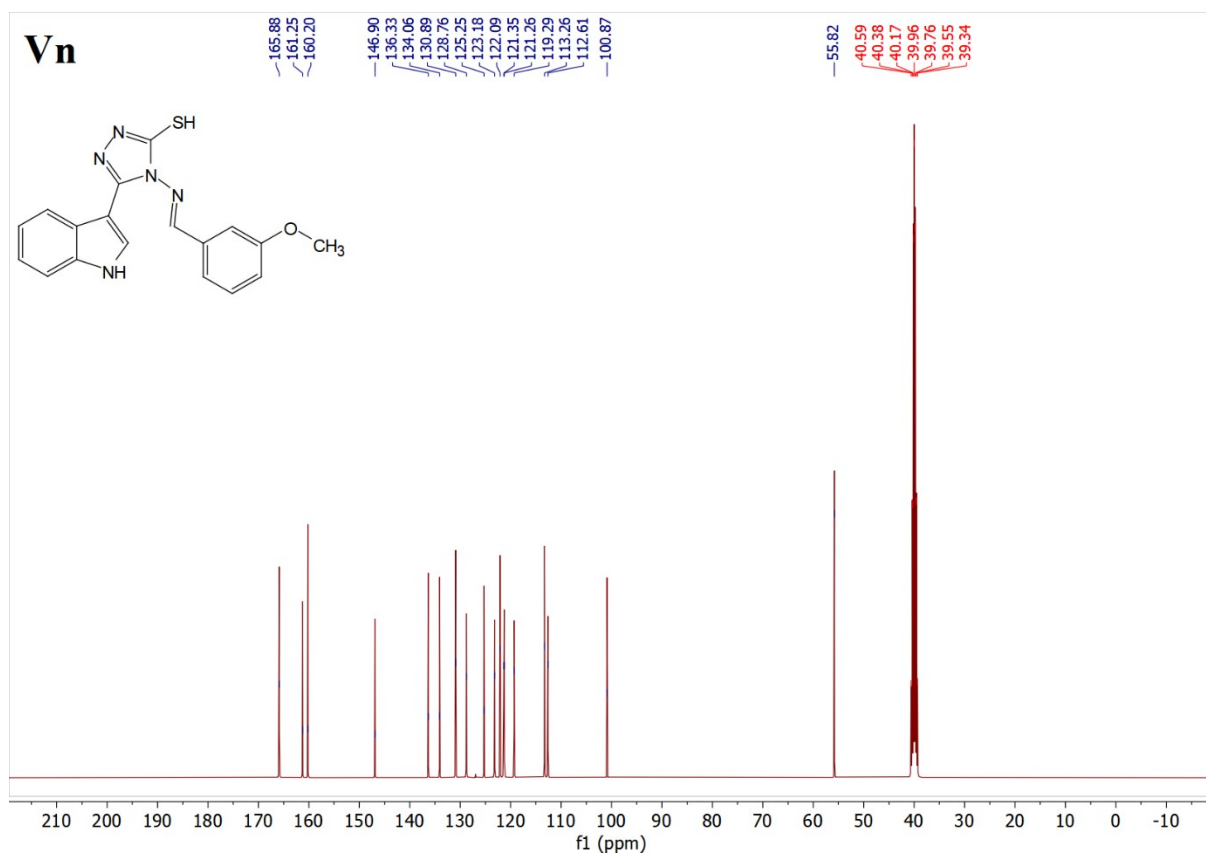

Supplement: d3md00524k2.pdf [file d3md00524k2.pdf]
